1  
2  
3  
4  
5  
6  
7  
8  
9  
10  
11  
12  
13  
14  
15  
16  
17  
18  
19  
20  
21  
22  
23  
24  
25

## Plant defense resistance in natural enemies of a specialist insect herbivore

Xi Zhang<sup>a</sup>, Cong van Doan<sup>a</sup>, Carla C.M. Arce<sup>a,b</sup>, Lingfei Hu<sup>a</sup>, Sandra Gruenig<sup>a</sup>, Christian Parisod<sup>a</sup>, Bruce E. Hibbard<sup>c</sup>, Maxime Hervé<sup>d</sup>, Christelle A.M. Robert<sup>a\*</sup>, Ricardo A.R. Machado<sup>a\*</sup>, Matthias Erb<sup>a\*</sup>

<sup>a</sup> Institute of Plant Sciences, University of Bern, Altenbergrain 21, 3013 Bern, Switzerland

<sup>b</sup> Institute of Biology, University of Neuchâtel, Argand 11, 2000 Neuchâtel, Switzerland

<sup>c</sup> USDA-ARS Plant Genetics Research Unit, 1-33 Agriculture Building, MO 65211 Columbia, United States of America

<sup>d</sup> Institute for Genetics, Environment and Plant Protection, University of Rennes, Domaine de la Motte BP 35327, 35653 LE Rheu cedex, France

\*Corresponding authors:

Prof. Dr. Matthias Erb

Institute of Plant Sciences, Altenbergrain 21, CH-3013 Bern, Switzerland

Tel: +41 31 631 8668

Email: [matthias.erb@ips.unibe.ch](mailto:matthias.erb@ips.unibe.ch)

Dr. Christelle A.M. Robert

Institute of Plant Sciences, Altenbergrain 21, CH-3013 Bern, Switzerland

Tel: +41 31 631 3155

Email: [christelle.robert@ips.unibe.ch](mailto:christelle.robert@ips.unibe.ch)

Dr. Ricardo A.R. Machado

Institute of Plant Sciences, Altenbergrain 21, CH-3013 Bern, Switzerland

Tel: +41 31 631 88 14

Email: [ricardo.machado@ips.unibe.ch](mailto:ricardo.machado@ips.unibe.ch)

26 **Abstract:** Plants defend themselves against herbivores through the production of toxic and  
27 deterrent metabolites. Adapted herbivores can tolerate and sequester these metabolites, allowing  
28 them to feed on defended plants and become toxic to their own enemies. Can herbivore natural  
29 enemies overcome sequestered plant defense metabolites to prey on adapted herbivores? To  
30 address this question, we studied how entomopathogenic nematodes cope with benzoxazinoid  
31 defense metabolites that are produced by grasses and sequestered by a specialist maize herbivore,  
32 the western corn rootworm. We find that nematodes from US maize fields in regions in which the  
33 western corn rootworm was present over the last 50 years are behaviorally and metabolically  
34 resistant to sequestered benzoxazinoids and more infective towards the western corn rootworm  
35 than nematodes from other parts of the world. Exposure of a benzoxazinoid-susceptible nematode  
36 strain to the western corn rootworm for five generations results in higher behavioral and metabolic  
37 resistance and benzoxazinoid-dependent infectivity towards the western corn rootworm. Thus,  
38 herbivores that are exposed to a plant defense sequestering herbivore can evolve both behavioral  
39 and metabolic resistance to plant defense metabolites, and these traits are associated with higher  
40 infectivity towards a defense sequestering herbivore. We conclude that plant defense metabolites  
41 that are transferred through adapted herbivores may result in the evolution of resistance in  
42 herbivore natural enemies. Our study also identifies plant defense resistance as a novel target for  
43 the improvement of biological control agents.

44

45 **Key words:** Tritrophic interactions, plant secondary metabolism, biological control.

46 **Introduction**

47 Despite the high abundance and diversity of arthropod herbivores, plants dominate terrestrial  
48 (agro)-ecosystems (1). Predation by herbivore natural enemies and plant defenses are thought to  
49 contribute to this phenomenon (2, 3). Plants defend themselves against herbivores using a variety  
50 of strategies, including the production of specialized defense metabolites that are toxic and/or  
51 reduce their attractivity and digestibility (4-7). However, many herbivores evolved mechanisms to  
52 overcome the negative effects of plant defense metabolites, including behavioral avoidance,  
53 excretion, target site insensitivity and detoxification through conjugation and breakdown (6, 8, 9).  
54 As a result, herbivores are often able to feed on defended plants and to ingest plant toxins without  
55 suffering major fitness consequences.

56 The ability to tolerate plant toxins has also enabled some specialized herbivores to co-opt plant  
57 defense metabolites for self-defense against their own natural enemies (10, 11). Sequestration of  
58 plant toxins as a form of adaptation is relatively widespread in specialized insect herbivores (12,  
59 13). Plant toxins may also accumulate in non-adapted insect herbivores, which are often inefficient  
60 at metabolizing and/or detoxifying plant defense compounds (14-16). Consequently, predators,  
61 parasites and parasitoids are often exposed to plant toxins as they feed on herbivores. Despite the  
62 fact that plant toxin exposure of the third trophic level is common in nature, herbivore natural  
63 enemies succeed at controlling herbivores and reduce their negative impact on plant fitness and  
64 yield (3). How top-down control of herbivores is maintained in the face of the abundance, diversity  
65 and ubiquity of plant defense metabolites is a potentially important open question in multitrophic  
66 interaction research and chemical ecology.

67 One possible explanation for the success of herbivore natural enemies is that, similar to herbivores,  
68 they may have evolved the capacity to resist or tolerate plant defense metabolites (17). Different  
69 degrees of resistance to plant toxins have been observed in predators and parasitoids (18-21).  
70 However, whether plant defense metabolites can drive the evolution of resistance of members of  
71 the third trophic level, and to what extent resistance to plant defense metabolites improves the  
72 capacity of herbivore natural enemies to prey on adapted herbivores, is not well understood.

73 To address the questions above, we studied the impact of plant-derived benzoxazinoids on  
74 entomopathogenic nematodes. Benzoxazinoids are multifunctional defense metabolites that are  
75 produced by grasses such as wheat and maize (22) and protect them against generalist herbivores  
76 (23-25). The western corn rootworm (*Diabrotica virgifera virgifera*), a specialized maize  
77 herbivore and important agricultural pest, is fully resistant to benzoxazinoids (26). The rootworm

78 larvae are attracted to benzoxazinoids (27) and accumulate them in their bodies (28).  
79 Entomopathogenic nematodes such as *Heterorhabditis bacteriophora* are common in natural and  
80 agricultural ecosystems across the globe and co-occur with the western corn rootworm in some  
81 areas. They are used as biological control agents against many different root pests, including the  
82 western corn rootworm (29, 30). Benzoxazinoid sequestration by the western corn rootworm  
83 reduces the capacity of a commercial *H. bacteriophora* strain to infect and kill the herbivore,  
84 suggesting that the corn rootworm co-opts these plant defense metabolites for self-protection  
85 against entomopathogenic nematodes (28). Using natural variation and forward evolution, we  
86 investigated whether adapted *H. bacteriophora* nematodes are able to overcome this defenses  
87 strategy of the western corn rootworm, and whether their capacity to resist benzoxazinoids is  
88 associated with increased infectivity towards the western corn rootworm.

## 89 **Results**

90 To test whether entomopathogenic nematodes that share an evolutionary history with the western  
91 corn rootworm may be able to resist benzoxazinoids, we established a global collection of 25  
92 *Heterorhabditis spp.* strains, including strains collected from regions in which the western corn  
93 rootworm has been present for more than 50 years (henceforth called the primary range), and  
94 strains collected from other regions of the world in which the western corn rootworm is not present  
95 or has not been present until recently (Fig. 1A, table S1). Nematodes from the primary range where  
96 isolated from maize fields in which the western corn rootworm is regularly present. They are thus  
97 likely to have encountered this herbivore in the past. *H. bacteriophora* has a broad host range, and  
98 the strains may also have infected other root herbivores occurring in maize fields, including  
99 wireworms and other rootworm species. Benzoxazinoids and their breakdown products can be  
100 found in the midgut of a wide range of insect herbivores (31, 32), but the western corn rootworm  
101 is the only herbivore known to selectively accumulate benzoxazinoids in its hemolymph (28).  
102 Nematode strains from other parts of the world never encountered the western corn rootworm, as  
103 they came from regions where the rootworm is not present, or they were isolated before the western  
104 corn rootworm invaded these regions (table S1).

105 Using internal transcribed spacer rRNA gene sequencing, 19 nematode strains within our  
106 collection were confirmed to be *H. bacteriophora*. Three strains from China were re-classified as  
107 *H. beicheriana*, and three strains from the US were identified as *H. georgiana*, both of which are  
108 closely related to *H. bacteriophora*. In a first experiment, we compared the infectiveness of the  
109 different nematode strains towards larvae of the western corn rootworm and larvae of the banded

110 cucumber beetle (*D. balteata*). In contrast to the western corn rootworm, the banded cucumber  
 111 beetle feeds on many different plant species apart from maize and does not sequester  
 112 benzoxazinoids (Fig. 1B and S1) (28). The banded cucumber beetle occurs mainly in Central  
 113 America, Mexico and the Southern US, outside of our collection range. Thus, none of the tested  
 114 nematode strains are likely to share an evolutionary history with this herbivore.

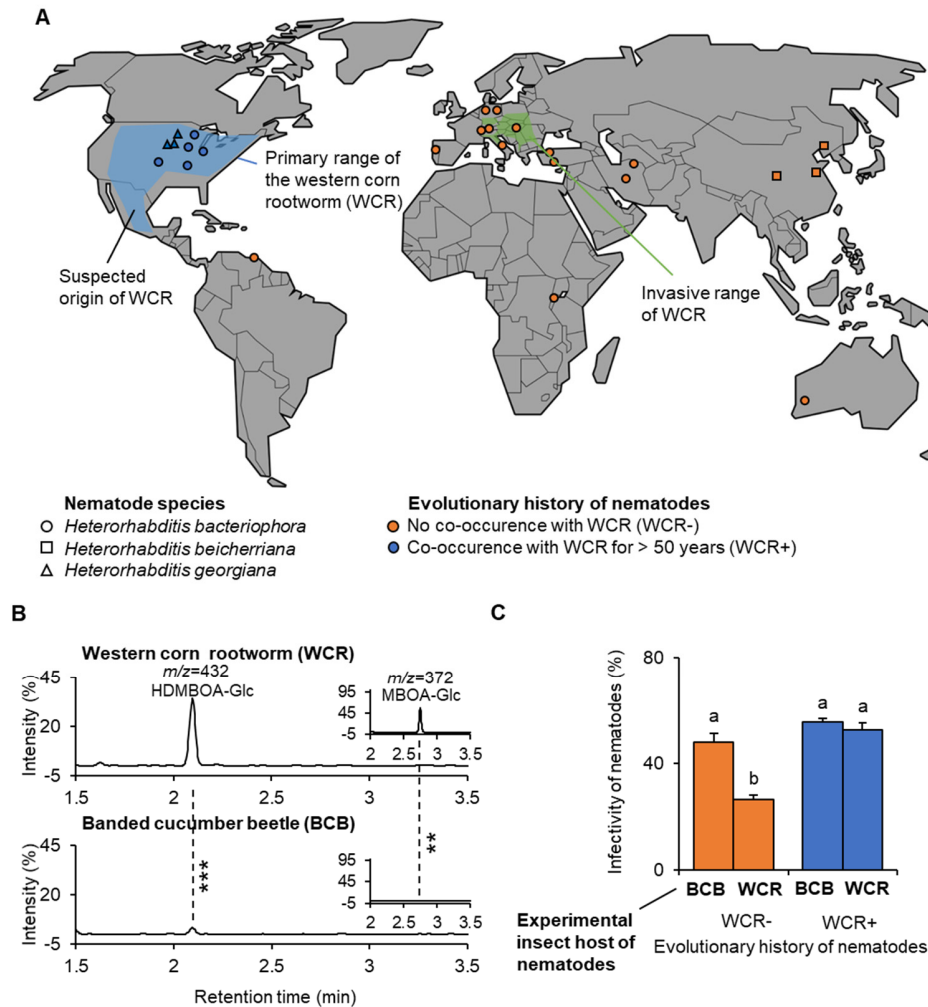

115

116 **Fig. 1. Entomopathogenic nematodes from the primary range of the benzoxazinoid-sequestering western corn**  
 117 **rootworm are more infective towards the western corn rootworm than the non-sequestering banded cucumber**  
 118 **beetle.** (A) World map showing the origin of the collected entomopathogenic nematode strains together with the  
 119 primary and invasive ranges of the western corn rootworm, a specialized maize herbivore (WCR; data from 2012).  
 120 Note that nematode strains from the invasive range do not share any evolutionary history with WCR, as they were  
 121 collected before invasion. For detailed information about the different strains, refer to table S1. (B) Chromatograms  
 122 of plant-derived benzoxazinoids in the body of WCR (top), and the banded cucumber beetle (BCB, bottom) a  
 123 generalist root herbivore which does not sequester benzoxazinoids and is mainly present in Central America, Mexico  
 124 and the Southern US, outside of the nematode sampling range. Asterisks indicate significant differences between  
 125 herbivore species ( $P < 0.001$ ). For quantitative comparisons, refer to Fig. S1. (C) Infectivity of nematodes towards  
 126 WCR and BCB. Average (+SEM) infectivity is shown for nematodes with an evolutionary history with WCR of more  
 127 than 50 years (blue) and nematodes without evolutionary history with WCR (orange). Different letters indicate  
 128 significant differences between treatments (False discovery rate corrected  $P < 0.05$ ).

129 Infectivity tests revealed a significant interaction between the host herbivore species and the  
130 evolutionary history of the nematodes (Fig. 1C, table S3). Nematode strains from the primary range  
131 of the western corn rootworm were able to infect and kill the western corn rootworm and the  
132 banded cucumber equally well. By contrast, the infectivity of nematodes from outside the primary  
133 range was significantly lower for the western corn rootworm than the banded cucumber beetle  
134 (Fig. 1C). Thus, nematodes that evolved in the presence of the western corn rootworm have an  
135 increased capacity to infect and kill this specific herbivore. This pattern was similar when only  
136 strains belonging to *H. bacteriophora* were considered (Fig. S2). The infectivity of *H. georgiana*  
137 strains, all of which come from the primary range of the western corn rootworm, was higher  
138 towards the western corn rootworm than the infectivity of *H. beicheriana* strains, which come from  
139 Asia where the western corn rootworm is not present (Fig. S2).

140 The banded cucumber beetle and western corn rootworm differ in many traits apart from  
141 benzoxazinoids that may explain the pattern observed in Fig. 1. To specifically test for the role of  
142 benzoxazinoids in determining the higher infectivity of nematode strains from the primary range  
143 of the western corn rootworm, we exposed the different nematode strains to western corn rootworm  
144 larvae that previously fed on wild type or benzoxazinoid-deficient *bx1* maize mutant plants. *Bx1*-  
145 mutant fed western corn rootworm larvae accumulate only low amounts of benzoxazinoids (Fig.  
146 2A and S3) (28). Nematodes from the primary range were able to infect western corn rootworm  
147 larvae equally well, independently of whether the larvae fed on benzoxazinoid-containing wild  
148 type or benzoxazinoid-deficient *bx1* mutant maize roots (Fig. 2B). By contrast, nematodes from  
149 other parts of the world suffered from a suppression of infectivity when exposed to larvae fed on  
150 wild type plants compared to *bx1* mutant fed larvae (Fig. 2B). This pattern was largely consistent  
151 across strains (Fig. S4). The benzoxazinoid susceptibility of the different nematode strains (i.e. the  
152 difference in infectivity towards wild type and *bx1*-fed western corn rootworm larvae) was  
153 negatively correlated to their infectivity towards the western corn rootworm (as measured in the  
154 previous experiment; Fig. 2), but not correlated to their infectivity towards the banded cucumber  
155 beetle (Fig. S5). Thus, nematodes from the primary range are less susceptible to the benzoxazinoid-  
156 dependent defenses of the western corn rootworm than nematodes from other parts of the world,  
157 and this trait is associated with higher infectivity towards the western corn rootworm.

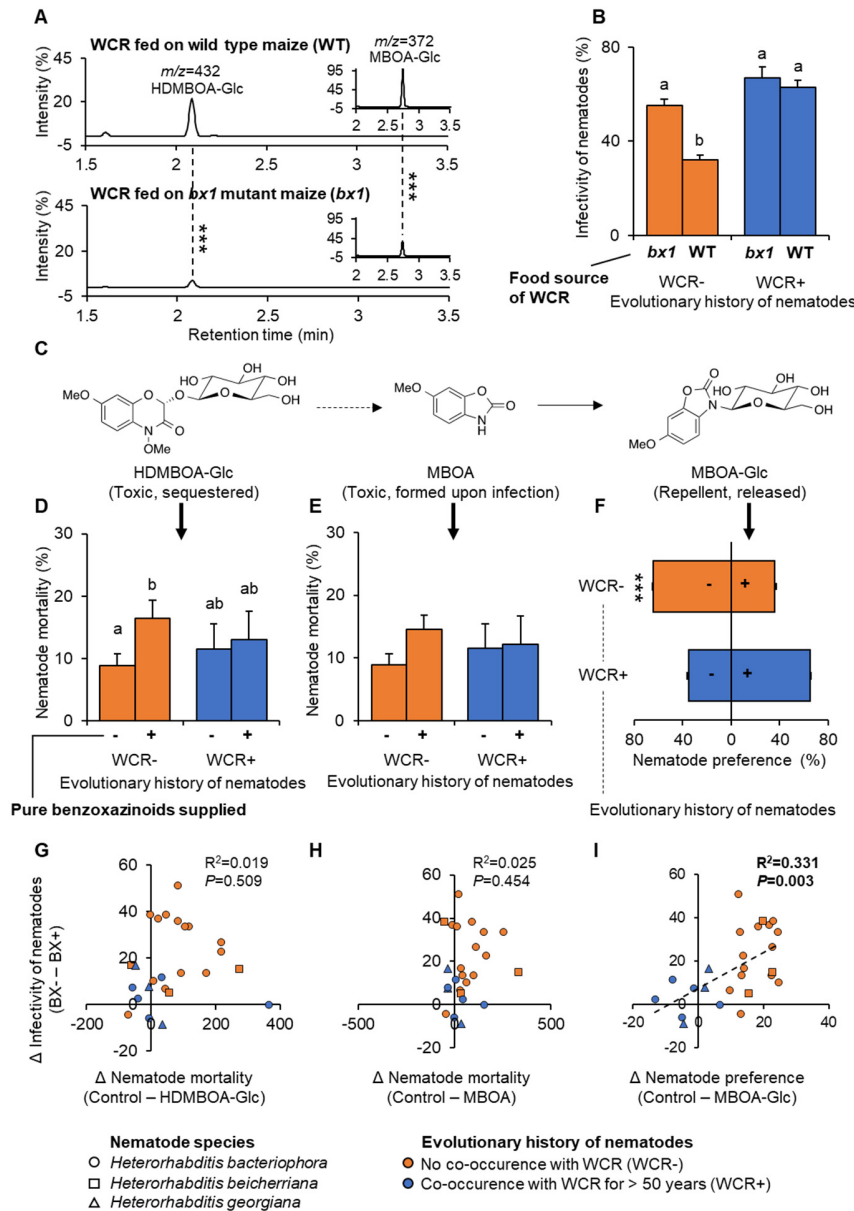

158

159 **Fig. 2. Nematodes from the primary range of the western corn rootworm are more resistant to sequestered**  
 160 **benzoxazinoids.** (A) Chromatograms of plant-derived benzoxazinoids in the body of western corn rootworm (WCR)  
 161 larvae fed on wild type (WT, top) and benzoxazinoid-deficient *bx1* mutant maize plants (bottom). Asterisks indicate  
 162 significant differences ( $P < 0.001$ ). (B) Infectivity of nematodes that share an evolutionary history with the western  
 163 corn rootworm (WCR+, blue) or not (WCR-, orange) towards WCR larvae fed on WT or *bx1* mutant plants. Different  
 164 letters indicate significant differences between treatments (False discovery rate corrected  $P < 0.05$ ). (C)  
 165 Benzoxazinoids found in WCR larvae. Two-hydroxy-4,7-dimethoxy-1,4-benzoxazin-3-one *O*-glucoside (HDMBOA-  
 166 Glc) accumulates in the larval body and is toxic for nematodes. Six-methoxy-2-benzoxazolinone (MBOA) is formed  
 167 upon tissue disruption and nematode attack and is also toxic. Six-methoxy-2-benzoxazolinone *N*-glucoside (MBOA-  
 168 Glc) is released by the larvae. It is not directly toxic but repels the nematodes. (D-E) Impact of physiologically relevant  
 169 doses of HDMBOA-Glc (150  $\mu\text{g/mL}$ ) and MBOA (25  $\mu\text{g/mL}$ ) on nematode mortality. Different letters indicate  
 170 significant differences between treatments (False discovery rate corrected  $P < 0.05$ ). (F) Impact of physiological  
 171 doses of MBOA-Glc (3  $\mu\text{g/mL}$ ) on nematode attraction. Asterisks indicate a significant effect of MBOA-Glc ( $P < 0.001$ ).  
 172 (G-I) Linear correlations between benzoxazinoid dependent infectivity (data from (B)) and in vitro benzoxazinoid  
 173 resistance (data from (D-F)).  $R^2$  and  $P$ -values of linear regressions are shown. Dashed regression lines are shown for  
 174 significant linear correlations.

175 Benzoxazinoids can protect the western corn rootworm from nematodes through a series of  
176 different, mutually non-exclusive mechanisms (Fig. 2C) (28). Six-methoxy-2-benzoxazolinone *N*-  
177 glucoside (MBOA-Glc) is an insect-specific conjugate formed from benzoxazinoid breakdown  
178 products that is released by the larvae and accumulates on their cuticle, thus making them less  
179 attractive to entomopathogenic nematodes. Two-hydroxy-4,7-dimethoxy-1,4-benzoxazin-3-one  
180 *O*-glucoside (HDMBOA-Glc) is contained within the larval body and is directly toxic to the  
181 nematodes (28). Upon nematode-infection, HDMBOA-Glc is broken down to 6-methoxy-2-  
182 benzoxazolinone (MBOA), which also reduces nematode survival (28). In choice experiments,  
183 MBOA-Glc reduced the attraction of nematodes that share no evolutionary history with the  
184 western corn rootworm, while nematodes from the primary range did not show a negative response  
185 towards MBOA-Glc (Fig. 2F and S6). Physiological doses of HDMBOA-Glc induced mortality in  
186 strains that shared no evolutionary history with the western corn rootworm, but not in strains from  
187 the primary range (Fig. 2D). No clear effects were found for MBOA-induced mortality (Fig 2E).  
188 Simple linear regression analysis revealed a positive correlation between the avoidance of MBOA-  
189 Glc and the benzoxazinoid-specific suppression of nematode infectivity (Fig. 2I). Model selection  
190 applied on a multiple linear regression including all explanatory factors and their interactions  
191 resulted in a model with the behavioral response towards MBOA-Glc alone explaining 61% of  
192 benzoxazinoid-dependent nematode infectivity across the different strains (Table S4). Taken  
193 together, these results show that nematodes from the primary range of the western corn rootworm  
194 do not avoid an insect-specific benzoxazinoid breakdown product and are more resistant to  
195 sequestered benzoxazinoids. Furthermore, the loss of behavioral avoidance of MBOA-Glc is  
196 associated with an increased capacity to infect benzoxazinoid-sequestering western corn rootworm  
197 larvae.

198 Benzoxazinoid tolerance in the nematode strains from maize fields of the primary range of the  
199 western corn rootworm may be confounded by population structure. Furthermore, their  
200 benzoxazinoid resistance may stem from exposure to benzoxazinoids exuded by maize roots rather  
201 than benzoxazinoids that are sequestered by the western corn rootworm. To test whether exposure  
202 to a benzoxazinoid-sequestering host can directly leads to the evolution of benzoxazinoid  
203 resistance, we designed a real-time evolution experiment. The benzoxazinoid-susceptible *H.*  
204 *bacteriophora* strain RW14 was multiplied and divided into 20 experimental (sub-)populations.  
205 Ten populations were then reared on banded cucumber beetle larvae and ten populations were  
206 reared on western corn rootworm larvae, both of which were fed on wild type maize roots. Using  
207 these two herbivore species allowed us to assess evolution on two natural hosts with different



208 abilities to sequester benzoxazinoids. Subsequent infectivity tests were performed with wild-type  
209 and *bx1* fed western corn rootworm larvae to specifically assess the evolution of benzoxazinoid-  
210 resistance following exposure to the different herbivores. In the F1 generation, all experimental  
211 nematode populations showed reduced infectiveness towards wild type-fed western corn rootworm  
212 larvae compared to *bx1*-fed larvae (Fig 3A and S7). After five generations of selection, nematodes  
213 reared on banded cucumber beetle larvae still showed reduced infectivity towards wild-type fed  
214 western corn rootworm larvae, even though the effect was less strong than in the F1 generation  
215 (Fig. 3B and S8). By contrast, nematodes reared on the western corn rootworm were overall better  
216 able to infect the western corn rootworm and did no longer show a reduction in infectivity on wild  
217 type fed larvae compared to *bx1*-fed larvae (Fig. 3B and S8). The nematodes were even more  
218 successful on wild type fed western corn rootworm larvae than on *bx1*-mutant fed larvae (Fig. 3B).  
219 Thus, selection on a benzoxazinoid-sequestering host over five generations is sufficient for  
220 susceptible nematodes to evolve complete resistance to benzoxazinoid-dependent defenses.

221 To understand how the western corn rootworm-selected nematode populations may achieve higher  
222 infectiveness towards benzoxazinoid-containing western corn rootworm larvae, we subjected them  
223 to the same series of bioassays as the natural strain collection before (Fig. 3 C-E). Nematodes  
224 selected on banded cucumber beetle larvae preferred to avoid MBOA-Glc, while nematodes  
225 selected on western corn rootworm larvae were attracted by this compound (Fig. 3E and S9).  
226 Furthermore, HDMBOA-Glc and MBOA reduced the survival of nematodes selected on the  
227 banded cucumber beetle, but did not reduce survival of nematodes selected on the western corn  
228 rootworm (Fig. 3C-D and S9). Simple linear regression analysis revealed a correlation between  
229 the behavioral response to MBOA-Glc and benzoxazinoid-specific nematode infectivity as well as  
230 HDMBOA-Glc and MBOA toxicity and benzoxazinoid-specific nematode infectivity (Fig. 3 F-  
231 H). Multiple linear regression including all explanatory factors and their interactions, followed by  
232 model selection and averaging, resulted in a model with MBOA-Glc repellence and HDMBOA-  
233 Glc toxicity explaining 82% of the benzoxazinoid-dependent nematode infectivity across strains  
234 (Table S4). Thus, similar to the pattern observed for the natural strains, nematodes exposed to the  
235 western corn rootworm for five generations do no longer avoid an insect-specific benzoxazinoid  
236 breakdown product and become resistant to a sequestered benzoxazinoid and its breakdown  
237 product. Furthermore, their increased capacity to infect benzoxazinoid-sequestering western corn  
238 rootworm larvae is associated with both a loss of behavioral aversion and reduced benzoxazinoid  
239 toxicity.

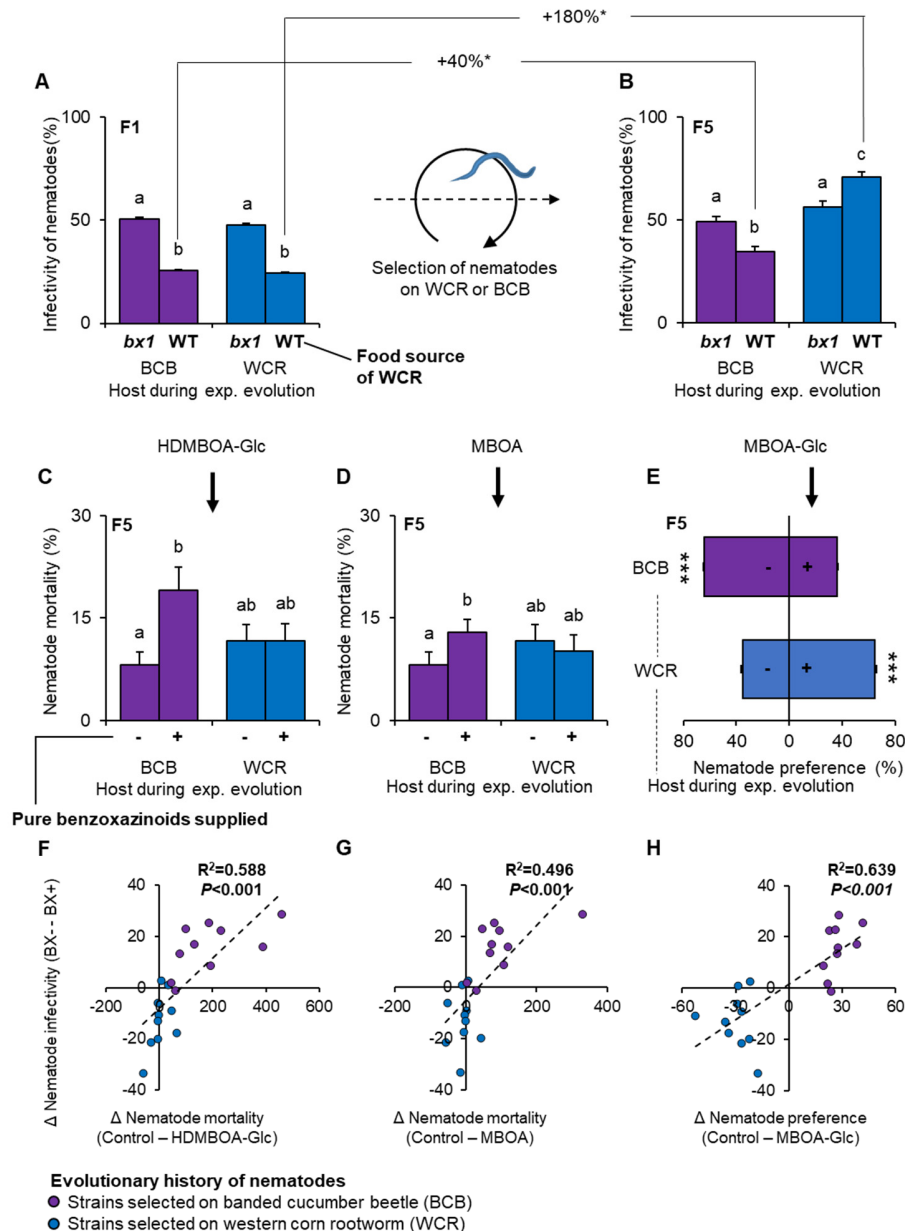

240

241 **Fig. 3. Rapid evolution of benzoxazinoid resistance and infectivity in nematodes exposed to the western corn**  
 242 **rootworm.** (A) Infectivity of F1 nematodes reared on the western corn rootworm (WCR+, blue) or the banded  
 243 cucumber beetle (BCB, purple) for one generation, exposed to WCR larvae fed on WT or *bx1* mutant plants. Different  
 244 letters indicate significant differences between treatments (False discovery rate corrected least square means,  $P<0.05$ ).  
 245 (B) Infectivity of F5 nematodes reared on the western corn rootworm (WCR+, blue) or the banded cucumber beetle  
 246 (BCB, purple) for five generations and exposed to WCR larvae fed on WT or *bx1* mutant plants. Different letters  
 247 indicate significant differences between treatments (False discovery rate corrected  $P<0.05$ ). Significant changes  
 248 ( $P<0.05$ ) in infectivity between F1 and F5 nematodes are indicated by asterisks. (C-D) Impact of physiologically  
 249 relevant doses of HDMBOA-Glc (150  $\mu\text{g}/\text{mL}$ ) and MBOA (25  $\mu\text{g}/\text{mL}$ ) on nematode mortality. Different letters  
 250 indicate significant differences between treatments (False discovery rate corrected  $P<0.05$ ). (E) Impact of  
 251 physiological doses of MBOA-Glc (3  $\mu\text{g}/\text{mL}$ ) on nematode attraction. Asterisks indicate a significant effect of  
 252 MBOA-Glc ( $P<0.001$ ). (F-H) Linear correlations between benzoxazinoid dependent infectivity (data from (B)) and  
 253 in vitro benzoxazinoid resistance (data from (C-E)).  $R^2$  and  $P$ -values of linear regressions are shown. Dashed  
 254 regression lines are drawn for significant correlations.

255 **Discussion**

256 Herbivore natural enemies are often exposed to plant defense metabolites, either by coming into  
257 contact with plants directly or by preying on herbivores that contain plant defenses (33-36). Many  
258 herbivore natural enemies have been found to avoid plant defenses by rejecting herbivores that  
259 accumulate or sequester toxins (37-39). However, avoidance comes with significant costs,  
260 especially when mobility and host availability are limited. Soil-borne herbivore natural enemies  
261 such as entomopathogenic nematodes can typically only cover short distances (40) and may have  
262 a limited choice of hosts in agricultural environments. Thus, they are likely to be under  
263 considerable pressure to overcome, rather than to avoid, plant toxins, which may explain why  
264 nematodes that share an evolutionary history with the western corn rootworm show benzoxazinoid  
265 resistance in the form of a loss of behavioral aversion. Together with their increased capacity to  
266 withstand the toxic effects of benzoxazinoids, this behavioral shift likely allows the nematodes to  
267 prey successfully on benzoxazinoid-sequestering hosts such as the western corn rootworm. The  
268 exact contribution of the western corn rootworm to nematode evolution in the field relative to other  
269 soil-borne organisms that are commonly present in US maize fields and may modulate  
270 benzoxazinoid exposure requires further study. Given the dominance of the western corn rootworm  
271 in maize fields in the areas from which the benzoxazinoid-resistant nematodes were sampled,  
272 however, we consider it likely that their resistance traits originate from the selection pressure  
273 exerted by the western corn rootworm.

274 The real-time evolution experiment further demonstrates that benzoxazinoid resistance in  
275 nematodes can evolve rapidly following exposure to the western corn rootworm, most likely  
276 through standing genetic variation. The finding that nematodes selected on the banded cucumber  
277 beetle also become slightly less susceptible to benzoxazinoid-dependent defenses is noteworthy in  
278 this context, as it may indicate that plant defense resistance in herbivore natural enemies can also  
279 evolve in the absence of a defense-sequestering herbivore, for instance through exposure to  
280 residual plant defense levels in the soil as well as the gut and the frass of the herbivore. Whether  
281 evolved resistance to plant toxins is common in herbivore natural enemies remains to be  
282 determined. Given that exposure of natural enemies to plant toxins is frequent in nature (33-36)  
283 and that different natural enemies have been reported to resist and accumulate plant toxins (18-  
284 21), we expect evolved behavioral avoidance, metabolic resistance and tolerance strategies to be  
285 widespread among members of the third trophic level. Host diversity and diet breadth will likely

286 determine the prevalence and biochemical architecture of these traits in herbivore natural enemies  
287 (20).

288 The diversity of plant defense metabolites and arthropod herbivores in nature is thought to be the  
289 result of an ongoing co-evolutionary arms race (41-45). Herbivore natural enemies have been  
290 shown to be negatively affected by plant defense metabolites in this context (46-48). The  
291 possibility that herbivore natural enemies may evolve resistance to increasingly toxic herbivores  
292 been considered (17,18), but, to the best of our knowledge, not been addressed through  
293 manipulative experiments. Instead, adaptations of herbivore natural enemies to plant chemicals  
294 have been investigated in detail in the context of plant volatiles that serve as foraging cues for  
295 herbivore natural enemies (48-50), including volatiles that attracted entomopathogenic nematodes  
296 (51), and in the context of extrafloral nectar as food source (50, 52). Although conducted in an  
297 agricultural system, the present study does support an evolutionary link between the co-  
298 evolutionary arms race of plants and herbivores and the third trophic level by showing that plant  
299 defense metabolites may influence the evolution of herbivore natural enemies as they are  
300 transferred through adapted herbivores. Trophic transfer of defense metabolites may promote the  
301 specialization and diversification of herbivore natural enemies (46). In wild systems, resistance to  
302 plant defenses by herbivore natural enemies may reduce the penalty for plants facing adapted  
303 herbivores (17), which again may reduce the negative selection pressure on basal plant defense  
304 metabolites and thereby contribute to within-plant chemical diversity. Detailed mechanistic and  
305 evolutionary studies, including broad phylogenetic analyses of multitrophic interaction networks  
306 in natural systems, could help to shed further light on these hypotheses.

307 Reducing the use of synthetic pesticides is an important aim in sustainable agriculture. The use of  
308 herbivore natural enemies as biological control agents is a promising strategy in this context (53).  
309 However, the efficacy of biocontrol agents is often limited, and a better understanding of the  
310 factors that determine their success is thus important to improve their use (54). Our study confirms  
311 that plant toxins can limit the capacity of natural enemies to control agricultural pests (17, 28), but  
312 also shows that plant toxin susceptibility shows pronounced heritable variation and can be offset  
313 rapidly through artificial selection. Plant toxin resistance thus represents a promising breeding  
314 target for the improvement of biological control agents.

## 315 **Materials and Methods**

### 316 Insects

317 Western corn rootworm (WCR, *Diabrotica virgifera virgifera* LeConte) eggs were supplied by the  
318 USDA-ARS-NCARL, Brookings, SD, USA. Banded cucumber beetle (BCB, *D. balteata*  
319 LeConte) eggs were obtained from Syngenta Crop Protection AG, Stein, CH. After hatching, WCR  
320 and BCB neonates were reared on freshly germinated wild type (B73) maize seeds or on the  
321 benzoxazinoid mutant line *bx1* (55). Third instar WCR and BCB larvae were used for all  
322 experiments. *Galleria mellonella* larvae were bought from Fischereibedarf Wenger, Bern, CH, and  
323 maintained at 8°C until use for nematode rearing.

### 324 Nematodes

325 *Nematode collection, identification and rearing.* We established a collection of 25 different  
326 *Heterorhabditis* spp. Detailed information on the different strains can be found in Table S1. Strains  
327 were either obtained from collaborators or collected from the field. Field collections were realized  
328 by collecting 45 soil cores (10 cm depth, 2 cm diameter) for each individual location. Soil cores  
329 were pooled for each location, homogenized and separated into 20 plastic containers (250 mL,  
330 Semadeni AG, CH). Five *G. mellonella* larvae were then placed on the soil surface of each  
331 container. The containers were closed with a plastic lid and incubated in darkness under  $24 \pm 2$  °C.  
332 Five to ten days later, all nematode-infected *G. mellonella* larvae were individually transferred to  
333 white traps (56), and emerging nematodes were used to infect another set of *G. mellonella* larvae  
334 (57). Irrespective of whether they were isolated from the field or obtained from collaborators, all  
335 nematodes were identified by internal transcribed spacer rRNA gene sequencing as described  
336 previously (58-60). The collected nematode progeny was maintained in 250 ml flasks (Greiner  
337 Bio-One GmbH, Frickenhausen, DE) at a density of one EPN per microliter tap water at 10 °C.  
338 Nematode strains were refreshed by multiplying them on *G. mellonella* larvae every 2-3 months.  
339 Nematodes that were less than one-month old were used for all experiments.

### 340 Benzoxazinoid analyses

341 Benzoxazinoids from BCB larvae and WCR larvae fed on B73 or *bx1* maize plants were extracted  
342 in 50% MeOH + 50% H<sub>2</sub>O + 0.5% formic acid. Five flash frozen larvae (~40 mg) were pooled and  
343 ground in 400 µL extraction buffer, and 5 replicates (each consisting of a pool of 5 larvae) were  
344 analyzed for each species and food source. The extracts were vortexed for 1 min and centrifuged  
345 twice at 17,000 g, at 4 °C. The supernatants were then analyzed on an Acquity UHPLC-MS system  
346 equipped with an electrospray source (Waters i-Class UHPLC-QDA, USA). The method was

347 modified from the one described previously (10). Briefly, the elution profile was: 0–3.5 min, 99–  
348 72.5% A in B; 3.5–5.5 min, 100% B; 5.5–7.5 min 99% A in B. The injection volume was 1  $\mu$ L.  
349 DIMBOA, MBOA, DIMBOA-Glc, HDMBOA-Glc and MBOA-Glc were all quantified in ESI-  
350 using selective ion recording (SIR) and external standard curves.

### 351 Real-time evolution

352 An experimental selection experiment was carried out using the RW14 nematode strain. A batch  
353 of newly hatched RW14 nematodes was aliquoted into 20 sub-populations, each consisting of  
354 20000 nematodes. Half the sub-populations were then reared on WCR larvae, and the other half  
355 on BCB larvae. Infection was performed in solo cups as described below in the section “Nematode  
356 infectivity”. For each population, 30 solo cups containing 5 larvae each were infected with 500  
357 nematodes. Five days later, all the infected larvae of the same sub-population were collected  
358 together and transferred to white traps for collecting nematode progenies. In between each  
359 generation of selection, the populations were amplified in *G. mellonella* larvae by infecting 15  
360 larvae per population with 200 nematodes each. The different populations were selected on WCR  
361 and BCB larvae for a total of 10 generations (5 generations within the selection host and 5  
362 amplification steps in between), and F1 and F5 nematodes (referring to the number of generations  
363 on the selection host) of 10 independently selected sub-populations were phenotyped.

### 364 Nematode infectivity

365 To quantify the infectivity of the nematodes, three to five WCR or BCB larvae were placed into  
366 individual solo cups (30 mL, Frontier Scientific Services, Inc., DE) containing a 5 mm layer of  
367 moist, autoclaved sand (Selmaterra, Bigler Samen AG, Thun, CH). Five hundred nematodes in  
368 500  $\mu$ L tap water were applied into each solo-cup. After incubating the cups at  $28 \pm 0.5$  °C for 5  
369 days, the percentage of nematode-infected larvae in each solo-cup was determined. Larvae were  
370 reared on either wild type (B73) or *bx1* mutant plants. Each solo cup was treated as an independent  
371 replicate. The exact numbers of independent biological replicates for the individual experiments  
372 and treatments are provided in Table S2.

### 373 Nematode behavior

374 To test the effect of MBOA-Glc on nematode behavior, we used the approach developed earlier  
375 (28). Briefly, a 5 mm agarose (5 g/L, Sigma Aldrich Chemie, CHE) layer was poured into a Petri-  
376 dish (9 cm diameter, Greiner Bio-One GmbH, Frickenhausen, DE). Three 5-mm-diameter wells  
377 were created equidistantly in the agar layer: one in the center of the plate, one on the right and one  
378 on the left side of the plate. One hundred nematodes in 100  $\mu$ L of water were dispensed the central

379 well. The remaining two wells were filled with either 50  $\mu$ L BCB exudates and 50  $\mu$ L tap water  
380 or with 50  $\mu$ L BCB exudates + 50  $\mu$ L MBOA-Glc (3 ng/ $\mu$ L in tap water). BCB exudates were used  
381 to elicit nematode search behavior. Exudates were obtained by rinsing third instar BCB larva with  
382 50  $\mu$ L tap water. Nematode preference was recorded 24 h after the start of the experiment by  
383 counting the number of nematodes within different sectors of the Petri dishes. The dishes were  
384 divided into 4 sectors of equal size, with two opposite sectors containing the treatment wells.  
385 Nematodes within the treatment sectors were counted. Each petri dish was treated as independent  
386 biological replicates, and 18-20 replicates were carried out for the different experiments and  
387 treatments (Table S2).

### 388 Nematode performance

389 The effects of benzoxazinoids on nematode survival and infectivity were tested as described (28).  
390 Briefly, 4000 nematodes were incubated in 4 mL tap water containing either MBOA (25  $\mu$ g/mL)  
391 or HDMBOA-Glc (150  $\mu$ g/mL). These concentrations represent physiologically relevant doses  
392 (28). Nematodes were kept in 50 mL flasks (Greiner Bio-One GmbH, Frickenhausen, DE) and  
393 incubated at 28°C. Nematodes incubated in tap water were used as controls. The number of dead  
394 and living nematodes was recorded 7 days after incubation. Flasks were treated as independent  
395 biological replicates, and 8-10 replicates were carried out for the different experiments and  
396 treatments (Table S2).

### 397 Statistical analyses

398 Generalized linear mixed models (GLMMs; distribution: binomial, link function: logit) were used  
399 to analyze mortality, infectivity and preference bioassays. Effects of nematode origin /  
400 experimental evolution host, different treatments and their interactions were used as main factors,  
401 and nematode strains / populations were used as a random factor. Wald tests were performed to  
402 assess significance of treatment effects. Pairwise comparisons of Estimated Marginal Means  
403 (EMMeans) corrected by the False Discovery Rate (FDR) method were used as post hoc tests (61).  
404 To determine correlations between benzoxazinoid resistance traits and benzoxazinoid dependent  
405 infectivity of the different nematode strains and populations the delta between BX+ (wild type fed  
406 WCR larvae) and BX- (*bx1*-mutant fed larvae) infectivity (i.e. benzoxazinoid dependent  
407 infectivity) was calculated based on EMMeans. Then, different types of benzoxazinoid resistance  
408 were determined for each strain by calculating the respective deltas as well. Linear models were  
409 then employed using benzoxazinoid dependent infectivity as response variable and the different  
410 resistance deltas as explanatory variables. A complementary approach to test for multiple

411 explanatory variables and their interactions was executed using model selection on a multiple  
412 linear regression including all resistance deltas and their interactions as explanatory variables. The  
413 Aikake Information Criterion corrected for small samples sizes (AICc) was used to rank  
414 submodels. Models showing a  $\Delta\text{AICc} \leq 2$  were combined using a model averaging procedure,  
415 which allows computing the relative importance of each resistance delta in the averaged model.  
416 The packages used for the different analyses were “RVAideMemoire”, “car”, “emmeans”,  
417 “MASS”, “lme4”, “lmerTest” and “MuMIn” (62). All the analyses were conducted in R 3.5.1.



418 **Acknowledgements:** We thank Ralf-Udo Ehlers (e-nema GmbH, Germany) for sharing nematode  
419 strains, Fausto Prada, Lisa Thönen, Virginia Hill, Anja Boss and Wei Huang for their assistance  
420 with laboratory experiments, David Ermacora for nematode rearing and Anouk Guyer, Zixiao  
421 Zhao and various interns from the Hibbard laboratory for field assistance. We also thank Lance  
422 Meinke (University of Nebraska), Joe Spencer (Illinois Natural History Survey), Sarah Zukoff  
423 (Kansas State University), Ken Ostlie (University of Minnesota), and Billy Fuller & Brad  
424 McMannus (South Dakota State University) for identifying fields for nematode collection.

425 **Funding:** This project was supported by the Swiss National Science Foundation (Grants # 155781,  
426 160786 and 157884) and the University of Bern.

427 **Author contributions:** M.E. and C.A.M.R. conceived the original project. M.E., C.A.M.R. and  
428 R.A.R.M. designed experiments. M.E., C.A.M.R. R.A.R.M., B.H. and C.P. supervised  
429 experiments. X.Z., C.C.M.A, R.A.R.M, D.v.C., S.G. and L.H. performed experiments. M.E.,  
430 R.A.R.M, X.Z. C.P and S.G. analyzed experiments. M.E. wrote the first draft of the manuscript.  
431 All authors contributed to the final version of the manuscript.

432 **Competing interests:** Authors declare no competing interests.

433 **Data and materials availability:** Some of the nematode strains were obtained under a materials  
434 transfer agreement. The data generated for this manuscript will be made available through a public  
435 repository at a later stage.

436

## References:

437

1. Y. M. Bar-On, R. Phillips, R. Milo, The biomass distribution on Earth. *Proc. Natl. Acad. Sci. U.S.A.* **115**, 6506–6511 (2018).

438

439

2. G. H. Nelson, E. S. Frederick, B. S. Lawrence, Community structure, population control, and competition. *Am. Nat.* **94**, 421–425 (1960).

440

441

3. M. C. Vidal, S. M. Murphy, Bottom-up vs. top-down effects on terrestrial insect herbivores: a meta-analysis. *Ecol. Lett.* **21**, 138–150 (2018).

442

443

4. E. E. Farmer, Ed., English, *Leaf Defence*. (Oxford University Press, Oxford, 2016).

444

5. U. Wittstock, J. Gershenzon, Constitutive plant toxins and their role in defense against herbivores and pathogens. *Curr. Opin. Plant Biol.* **5**, 300–307 (2002).

445

446

6. E. Stahl, O. Hilfiker, P. Reymond, Plant-arthropod interactions: who is the winner? *Plant J.* **93**, 703–728 (2018).

447

448

7. M. C. Schuman, I. T. Baldwin, The layers of plant responses to insect herbivores. *Annu. Rev. Entomol.* **61**, 373–394 (2016).

449

450

8. R. Karban, A. A. Agrawal, Herbivore offense. *Annu. Rev. Ecol. Syst.* **33**, 641–664 (2002).

451

9. D. G. Heckel, “Chapter 3: Insect detoxification and sequestration strategies.” in Annual Plant Reviews Volume 47: Insect-Plant Interactions, Wiley Blackwell, Chichester, England, Eds. (2014), pp. 77–114.

452

453

10. G. Petschenka, A. A. Agrawal, How herbivores coopt plant defenses: natural selection, specialization, and sequestration. *Curr. Opin. Insect Sci.* **14**, 17–24 (2016).

454

455

11. M. Erb, C. A. M. Robert, Sequestration of plant secondary metabolites by insect herbivores: molecular mechanisms and ecological consequences. *Curr. Opin. Insect Sci.* **14**, 8–11 (2016).

456

457

12. R. Nishida, Sequestration of defensive substances from plants by Lepidoptera. *Annu. Rev. Entomol.* **47**, 57–92 (2002).

458

459

13. S. E. W. Opitz, C. Müller, Plant chemistry and insect sequestration. *Chemoecology* **19**, 117–154 (2009).

460

461

14. K.S. Johnson, Comparative detoxification of plant (*Magnolia virginiana*) allelochemicals by generalist and specialist *Saturniid silkmoths*. *J. Chem. Ecol.* **25**, 253–269 (1999).

462

463

15. P. Kumar, P. Rathi, M. Schöttner, I. T. Baldwin, S. Pandit, Differences in nicotine metabolism of two *Nicotiana attenuata* herbivores render them differentially susceptible to a common native predator. *PLoS One* **9**, e95982 (2014).

464

465

16. P. J. Ode, Plant toxins and parasitoid trophic ecology. *Curr. Opin. Insect Sci.* **32**, 118–123

466

467

- 468 (2019).
- 469 17. P. J. Ode, Plant chemistry and natural enemy fitness: effects on herbivore and natural enemy  
470 interactions. *Annu. Rev. Entomol.* **51**, 163–185 (2006).
- 471 18. L. S. Fink, L. P. Brower, Birds can overcome the cardenolide defence of monarch butterflies  
472 in Mexico. *Nature* **291**, 67–70 (1981).
- 473 19. P. Barbosa, J. A. Saunders, J. Kemper, R. Trumbule, J. Olechno, P. Martinat, Plant  
474 allelochemicals and insect parasitoids effects of nicotine on *Cotesia congregata* (say)  
475 (Hymenoptera: Braconidae) and *Hyposoter annulipes* (Cresson) (Hymenoptera:  
476 Ichneumonidae). *J. Chem. Ecol.* **12**, 1319–1328 (1986).
- 477 20. J. H. Reudler, A. Biere, J. A. Harvey, S. van Nouhuys, Differential performance of a specialist  
478 and two generalist herbivores and their parasitoids on *Plantago lanceolata*. *J. Chem. Ecol.* **37**,  
479 765–778 (2011).
- 480 21. J. M. Pasteels, Chemical defence, offence and alliance in ants–aphids–ladybirds relationships.  
481 *Popul. Ecol.* **49**, 5–14 (2007).
- 482 22. M. Frey, K. Schullehner, R. Dick, A. Fiesselmann, A. Gierl, Benzoxazinoid biosynthesis, a  
483 model for evolution of secondary metabolic pathways in plants. *Phytochemistry* **70**, 1645–  
484 1651 (2009).
- 485 23. F. C. Wouters, B. Blanchette, J. Gershenzon, D. G. Vassão, Plant defense and herbivore  
486 counter-defense: benzoxazinoids and insect herbivores. *Phytochem. Rev.* **15**, 1127–1151  
487 (2016).
- 488 24. 26. B. Li, C. Förster, C. A. M. Rober, T. Züst, L. Hu, R. A. R. Machado, J. D. Berset, V.  
489 Handrick, T. Knauer, G. Hensel, W. Chen, J. Kumlehn, P. Yang, B. Keller, J. Gershenzon, G.  
490 Jander, T. G. Köllner, M. Erb, Convergent evolution of a metabolic switch between aphid and  
491 caterpillar resistance in cereals. *Sci. Adv.* **4**, eaat6797 (2018).
- 492 25. L. Hu, C. A. M. Robert, S. Cadot, X. Zhang, M. Ye, B. Li, D. Manzo, N. Chervet, T. Steinger,  
493 M. G. A. van der Heijden, K. Schlaeppli, M. Erb, Root exudate metabolites drive plant-soil  
494 feedbacks on growth and defense by shaping the rhizosphere microbiota. *Nat. Commun.* **9**,  
495 2738 (2018).
- 496 26. C. A. M. Robert, N. Veyrat, G. Glauser, G. Marti, G. R. Doyen, N. Villard, M. D. P. Gaillard,  
497 T. G. Köllner, D. Giron, M. Body, B. A. Babst, R. A. Ferrieri, T. C. J. Turlings, M. Erb, A  
498 specialist root herbivore exploits defensive metabolites to locate nutritious tissues. *Ecol. Lett.*  
499 **15**, 55–64 (2012).
- 500 27. L. Hu, P. Meteo, M. Ye, X. Zhang, J. D. Berset, V. Handrick, D. Radisch, V. Grabe, T. G.

- 501 Köllner, J. Gershenson, C. A. M. Robert, M. Erb, Plant iron acquisition strategy exploited by  
502 an insect herbivore. *Science* **361**, 694–697 (2018).
- 503 28. C. A. M. Robert, X. Zhang, R. A. R. Machado, S. Schirmer, M. Lori, P. Mateo, M. Erb, J.  
504 Gershenson, Sequestration and activation of plant toxins protect the western corn rootworm  
505 from enemies at multiple trophic levels. *eLife* **6**, e29307 (2017).
- 506 29. B. Kurtz, S. Toepfer, R.U. Ehlers, U. Kuhlmann, Assessment of establishment and persistence  
507 of entomopathogenic nematodes for biological control of western corn rootworm. *J. Appl.*  
508 *Entomol.* **131**, 420–425 (2007).
- 509 30. M. E. Gray, T. W. Sappington, N. J. Miller, J. Moeser, M. O. Bohn, Adaptation and  
510 invasiveness of western corn rootworm: intensifying research on a worsening pest. *Annu. Rev.*  
511 *Entomol.* **54**, 303–321 (2009).
- 512 31. G. Glauser, G. Marti, N. Villard, G. A. Doyen, J-U Wolfender, T. C. J. Turlings, M. Erb,  
513 Induction and detoxification of maize 1,4-benzoxazin-3-ones by insect herbivores. *Plant J.* **68**,  
514 901–911 (2011).
- 515 32. D. Maag, C. Dalvit, D. Thevenet, A. Köhler, F. C. Wouters, D. G. Vassao, J. Gershenson, J-  
516 L. Wolfender, T. C.J. Turlings, M. Erb, G. Glauser, 3-β-D-Glucopyranosyl-6-methoxy-2-  
517 benzoxazolinone (MBOA-N-Glc) is an insect detoxification product of maize 1,4-benzoxazin-  
518 3-ones. *Phytochemistry* **102**, 97–105 (2014).
- 519 33. T. A. Ugine, S. B. Krasnoff, R. J. Grebenok, S. T. Behmer, J. E. Losey, Prey nutrient content  
520 creates omnivores out of predators. *Ecol. Lett.* **22**, 275–283 (2019).
- 521 34. M. Coll, M. Guershon, Omnivory in terrestrial arthropods: mixing plant and prey diets. *Annu.*  
522 *Rev. Entomol.* **47**, 267–297 (2002).
- 523 35. A. T. Zemenick, R. R. Kula, L. Russo, J. A. Tooker, Network approach reveals parasitoid  
524 wasps to be generalized nectar foragers. *Arthropod Plant Interact.* **13**, 239-251 (2018).
- 525 36. W. H. Calvert, L. E. Hedrick, L. P. Brower, Mortality of the monarch butterfly (*Danaus*  
526 *plexippus* L.): avian predation at five overwintering sites in Mexico. *Science* **204**, 847–851  
527 (1979).
- 528 37. J. Skelhorn, C. Rowe, Avian predators taste-reject aposematic prey on the basis of their  
529 chemical defence. *Biol. Lett.* **2**, 348–350 (2006).
- 530 38. P. Kumar, S. S. Pandit, A. Steppuhn, I. T. Baldwin, Natural history-driven, plant-mediated  
531 RNAi-based study reveals CYP6B46's role in a nicotine-mediated antipredator herbivore  
532 defense. *Proc. Natl. Acad. Sci. U.S.A.* **111**, 1245–1252 (2014).
- 533 39. M. Ye, N. Veyrat, H. Xu, L. Hu, T. C. J. Turlings, M. Erb, An herbivore-induced plant volatile

- 534 reduces parasitoid attraction by changing the smell of caterpillars. *Sci. Adv.* **4**, eaar4767 (2018).
- 535 40. H. K. Kaya, R. Gaugler, Entomopathogenic nematodes. *Annu. Rev. Entomol.* **38**, 181–206
- 536 (1993).
- 537 41. T. Züst, C. Heichinger, U. Grossniklaus, R. Harrington, D. J. Kliebenstein, L. A. Turnbull,
- 538 Natural enemies drive geographic variation in plant defenses. *Science* **338**, 116–119 (2012).
- 539 42. A. A. Agrawal, A. P. Hastings, M. T. J. Johnson, J. L. Maron, J.P. Salminen, Insect herbivores
- 540 drive real-time ecological and evolutionary change in plant populations. *Science* **338**, 113–116
- 541 (2012).
- 542 43. D. J. Futuyma, A. A. Agrawal, Macroevolution and the biological diversity of plants and
- 543 herbivores. *Proc. Natl. Acad. Sci. U.S.A.* **106**, 18054–18061 (2009).
- 544 44. C. W. Wheat, H. Vogel, U. Wittstock, M. F. Braby, D. Underwood, T. Mitchell-Olds, The
- 545 genetic basis of a plant-insect coevolutionary key innovation. *Proc. Natl. Acad. Sci. U.S.A.*
- 546 **104**, 20427–20431 (2007).
- 547 45. P. R. Ehrlich, P. H. Raven, Butterflies and plants: a study in coevolution. *Evolution* **18**, 586-
- 548 608 (1964).
- 549 46. M. S. Singer, J. O. Stireman, The tri-trophic niche concept and adaptive radiation of
- 550 phytophagous insects. *Ecol. Lett.* **8**, 1247–1255 (2005).
- 551 47. I. Kaplan, J. S. Thaler, Plant resistance attenuates the consumptive and non-consumptive
- 552 impacts of predators on prey. *Oikos* **119**, 1105–1113 (2010).
- 553 48. R. J. Hopkins, N. M. van Dam, J. J. A. van Loon, Role of glucosinolates in insect-plant
- 554 relationships and multitrophic interactions. *Annu. Rev. Entomol.* **54**, 57–83 (2009).
- 555 49. T. C. J. Turlings, M. Erb, Tritrophic Interactions mediated by herbivore-induced plant
- 556 volatiles: mechanisms, ecological relevance, and application potential. *Annu. Rev. Entomol.*
- 557 **63**, 433–452 (2018).
- 558 50. M. Heil, J. Rattke, W. Boland, Postsecretory hydrolysis of nectar sucrose and specialization in
- 559 ant/plant mutualism. *Science* **308**, 560–563 (2005).
- 560 51. S. Rasmann, T. C. J. Turlings, Root signals that mediate mutualistic interactions in the
- 561 rhizosphere. *Curr. Opin. Plant Biol.* **32**, 62–68 (2016).
- 562 52. M. Heil, Extrafloral nectar at the plant-insect interface: a spotlight on chemical ecology,
- 563 phenotypic plasticity, and food webs. *Annu. Rev. Entomol.* **60**, 213–232 (2015)
- 564 53. J. C. van Lenteren, The state of commercial augmentative biological control: plenty of natural
- 565 enemies, but a frustrating lack of uptake. *BioControl* **57**, 1–20 (2012).
- 566 54. S. T. E. Lommen, P. W. de Jong, B. A. Pannebakker, It is time to bridge the gap between

- 567 exploring and exploiting: prospects for utilizing intraspecific genetic variation to optimize  
568 arthropods for augmentative pest control - a review. *Entomol. Exp. Appl.* **162**, 108–123 (2017).
- 569 55. D. Maag, A. Köhler, C. A. M. Robert, M. Frey, J. Wolfender, T. C. J. Turlings, G. Glauser, M.  
570 Erb, Highly localized and persistent induction of *bx1*-dependent herbivore resistance factors  
571 in maize. *Plant J.* **88**, 976–991 (2016).
- 572 56. K. Heungens, C. E. Cowles, H. Goodrich-Blair, Identification of *Xenorhabdus nematophila*  
573 genes required for mutualistic colonization of *Steinernema carpocapsae* nematodes. *Mol.*  
574 *Microbiol.* **45**, 1337–1353 (2002).
- 575 57. J. G. McMullen, S. P. Stock, In vivo and in vitro rearing of entomopathogenic nematodes  
576 (*Steinernematidae* and *Heterorhabditidae*). *J. Vis. Exp.* **91**, 52096 (2014).
- 577 58. R. A. R. Machado, D. Wüthrich, P. Kuhnert, C. C. M. Arce, L. Thönen, C. Ruiz, X. Zhang, C.  
578 A. M. Robert, J. Karimi, S. Kamali, J. Ma, R. Bruggmann, M. Erb, Whole-genome-based  
579 revisit of *Photorhabdus* phylogeny: proposal for the elevation of most *Photorhabdus*  
580 subspecies to the species level and description of one novel species *Photorhabdus bodei* sp.  
581 nov., and one novel subspecies *Photorhabdus laumondii* subsp. *clarkei* subsp. nov. *Int. J. Syst.*  
582 *Evol. Microbiol.* **68**, 2664–2681 (2018).
- 583 59. R. Campos-Herrera, E.G. Johnson, F.E. EL-Borai, R.J. Stuart, J.H. Graham, L.W. Duncan,  
584 Long-term stability of entomopathogenic nematode spatial patterns in soil as measured by  
585 sentinel insects and real-time PCR assays. *Ann. Appl. Biol.* **158**, 55–68 (2011).
- 586 60. T. C. Vrain, D. A. Wakarchuk, A. C. Levesque, R. I. Hamilton, Intraspecific rDNA restriction  
587 fragment length polymorphism in the *Xiphinema americanum* group. *Fundam. Appl. Nematol.*  
588 **15**, 563–573 (1992).
- 589 61. Y. Benjamini, Y. Hochberg, Controlling the false discovery rate: a practical and powerful  
590 approach to multiple testing. *J. R. Stat. Soc. Ser. B-Stat. Methodol.* **57**, 289-300 (1995).
- 591 62. M. R. Herve, Package ‘RVAideMemoire’, diverse basic statistical and graphical functions.  
592 Version 0.9-52 (The Comprehensive R Archive Network (CRAN), Vienna, Austria),  
593 <https://CRAN.R-project.org/web/packages/RVAideMemoire> (2015).
- 594  
595  
596

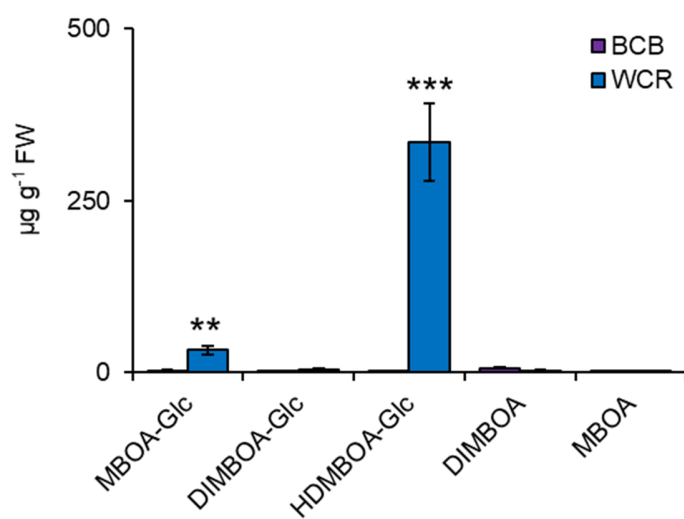

597 **Fig. S1. Quantification of plant-derived benzoxazinoids in different nematode hosts.** Absolute  
598 quantities of benzoxazinoids extracted from larvae of the western corn rootworm (WCR; blue) and  
599 the banded cucumber beetle (BCB) are shown. Asterisks indicate significant differences between  
600 herbivore species (\*\* $P < 0.01$ ; \*\*\*  $P < 0.001$ ).

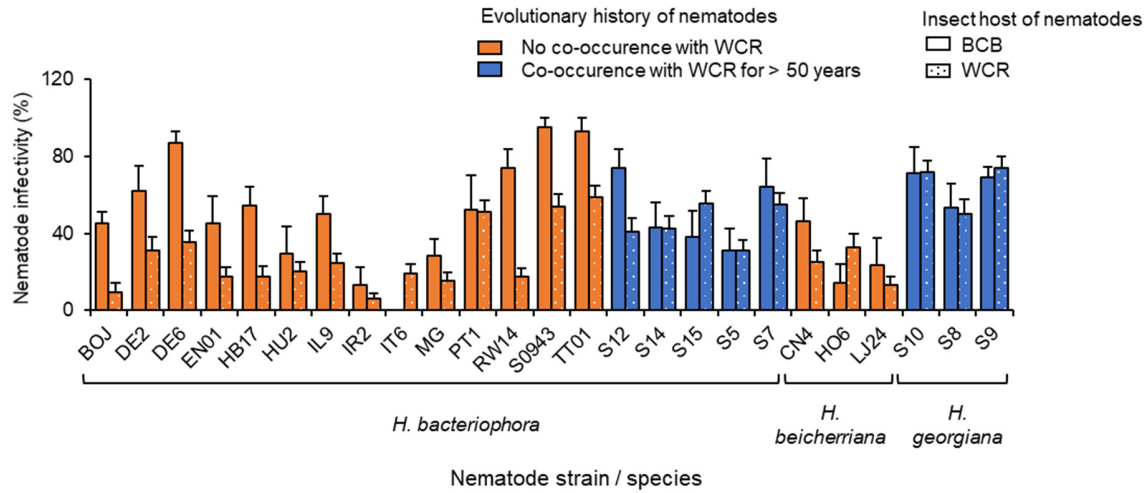

601  
602  
603  
604  
605  
606

**Fig. S2. Infectivity of individual nematode strains towards different herbivores.** Infectivity of individual nematode strains from the primary range of the western corn rootworm (blue) and other parts of the world (orange) towards the western corn rootworm (WCR; plain filled bars) and the banded cucumber beetle (BCB; dotted bars) is shown.



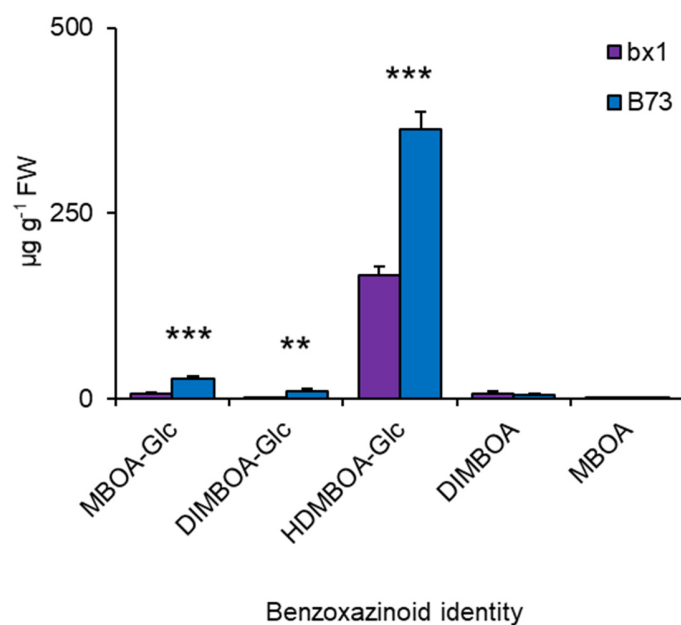

607 **Fig. S3. Quantification of benzoxazinoids in western corn rootworm larvae fed on wild type**  
608 **and *bx1* mutant maize roots.** Absolute quantities of benzoxazinoids extracted from larvae of the  
609 western corn rootworm fed on *bx1* mutant (*bx1*) and wild type (WT) maize roots are shown.  
610 Asterisks indicate significant differences between plant genotypes (\*\* $P < 0.01$ ; \*\*\*  $P < 0.001$ ).  
611

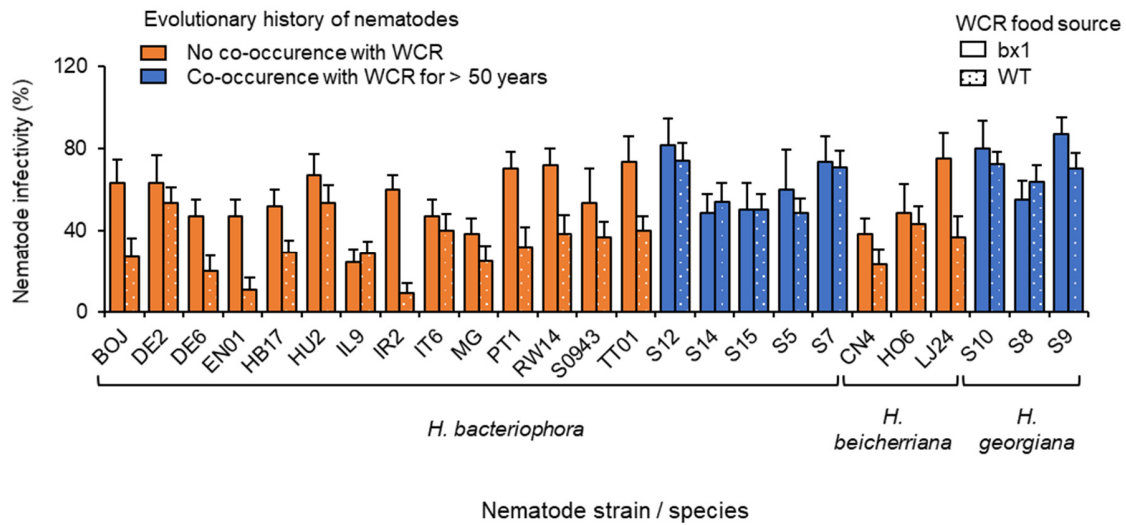

**Fig. S4. Impact of herbivore-sequestered benzoxazinoids on the infectivity of individual nematode strains.** Infectivity of individual nematode strains from the primary range of the western corn rootworm (WCR; blue) and other parts of the world (orange) towards WCR larvae fed on *bx1* mutant (*bx1*; plain filled bars) and wild type (WT; dotted bars) maize roots is shown.

612  
613  
614  
615  
616

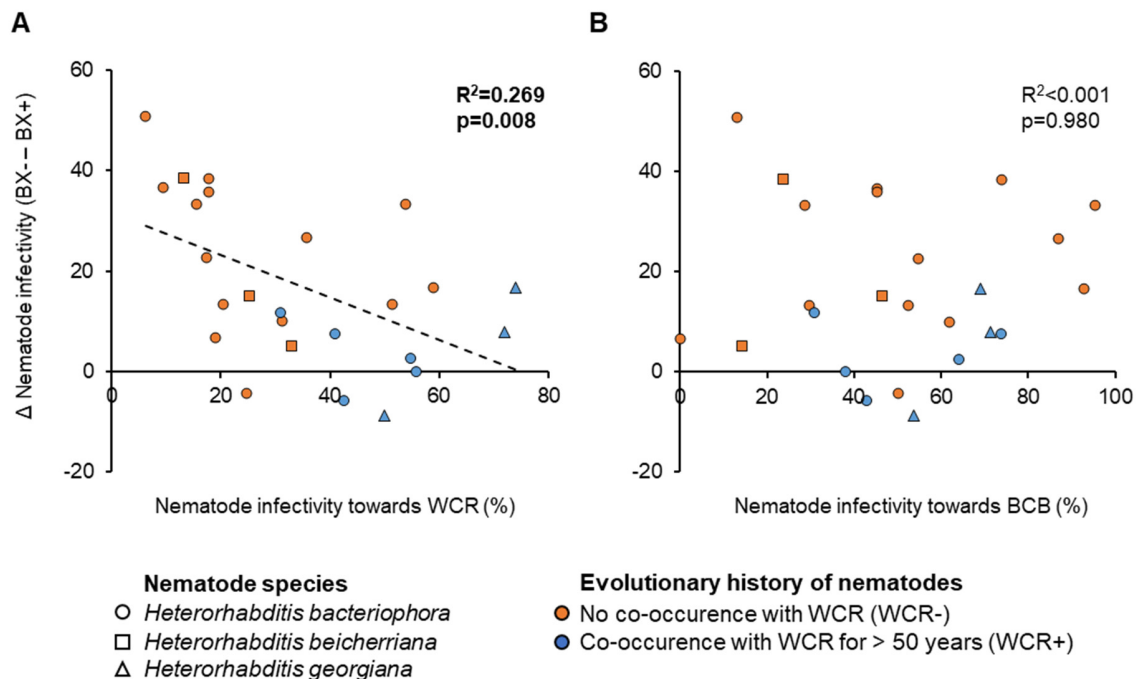

617  
618  
619  
620  
621  
622  
623  
624  
625  
626  
627

**Fig. S5. Correlations between benzoxazinoid-dependent infectivity and infectivity towards different herbivores.** Correlations are shown between the capacity of the different nematode strains to infect western corn rootworm (WCR) and banded cucumber beetle (BCB) larvae (Fig. S2) and their capacity to withstand sequestered benzoxazinoids (Fig. S4). Benzoxazinoid resistance is calculated by taking the difference in infectivity of the individual strains between *bx1* mutant (BX-) and wild type (BX+) maize root fed western corn rootworm larvae. Positive values correspond to higher infectiveness towards *bx1* mutant fed larvae. Significant correlations are indicated with dashed lines.  $R^2$  and  $P$ -values from Pearson product-moment correlations are provided.

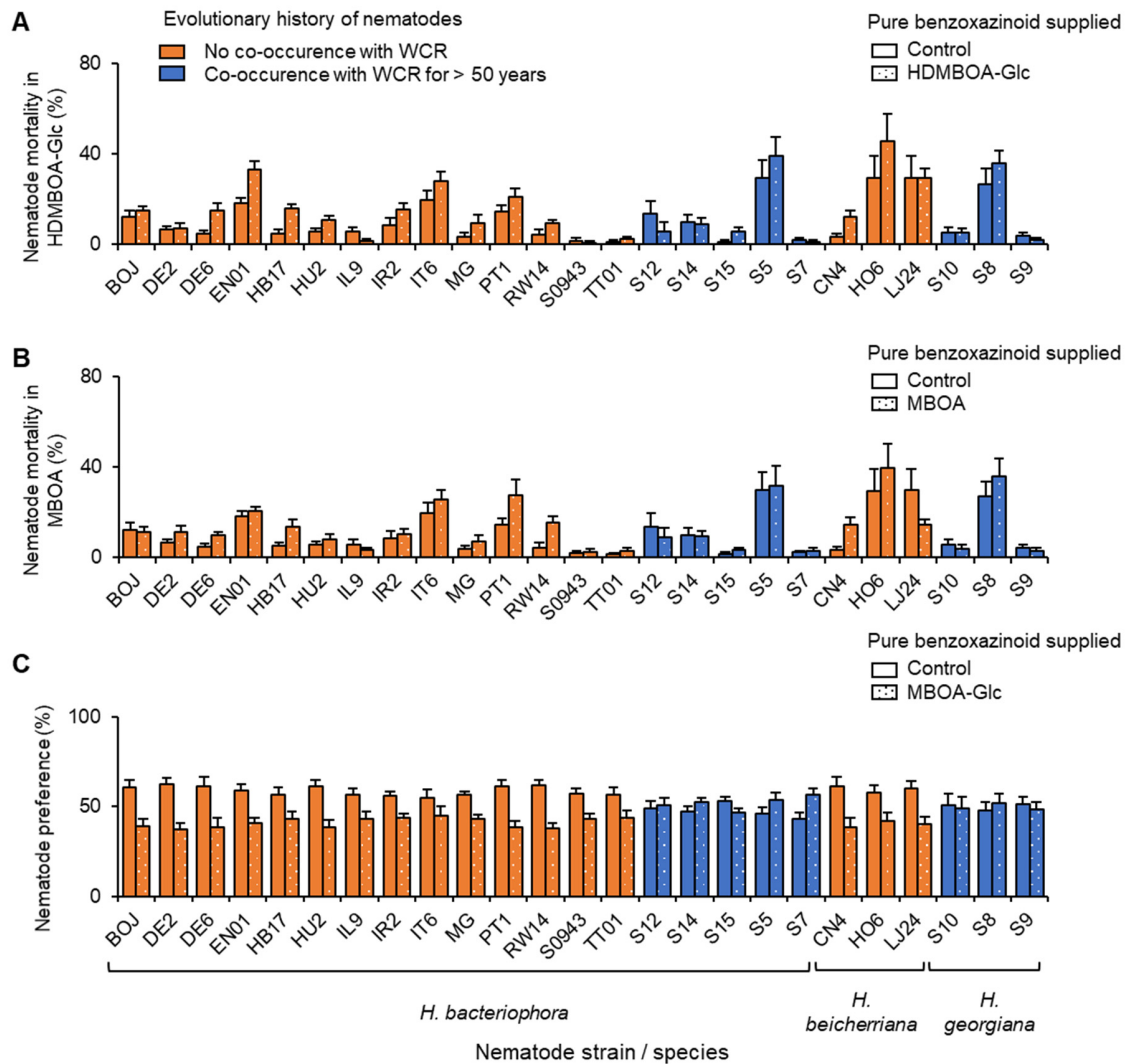

628 **Fig. S6. Impact of pure benzoxazinoids on individual nematode strains.** (A) Mortality of  
 629 individual nematode strains from the primary range of the western corn rootworm (WCR; blue)  
 630 and other parts of the world (orange) treated with water (plain filled bars) or 150  $\mu\text{g}/\text{mL}$   
 631 HDMBOA-Glc (dotted bars) is shown. (B) Mortality of nematodes treated with water or 25  $\mu\text{g}/\text{mL}$   
 632 MBOA. (C) Preference of nematodes for water or 3  $\mu\text{g}/\text{mL}$  MBOA-Glc.  
 633

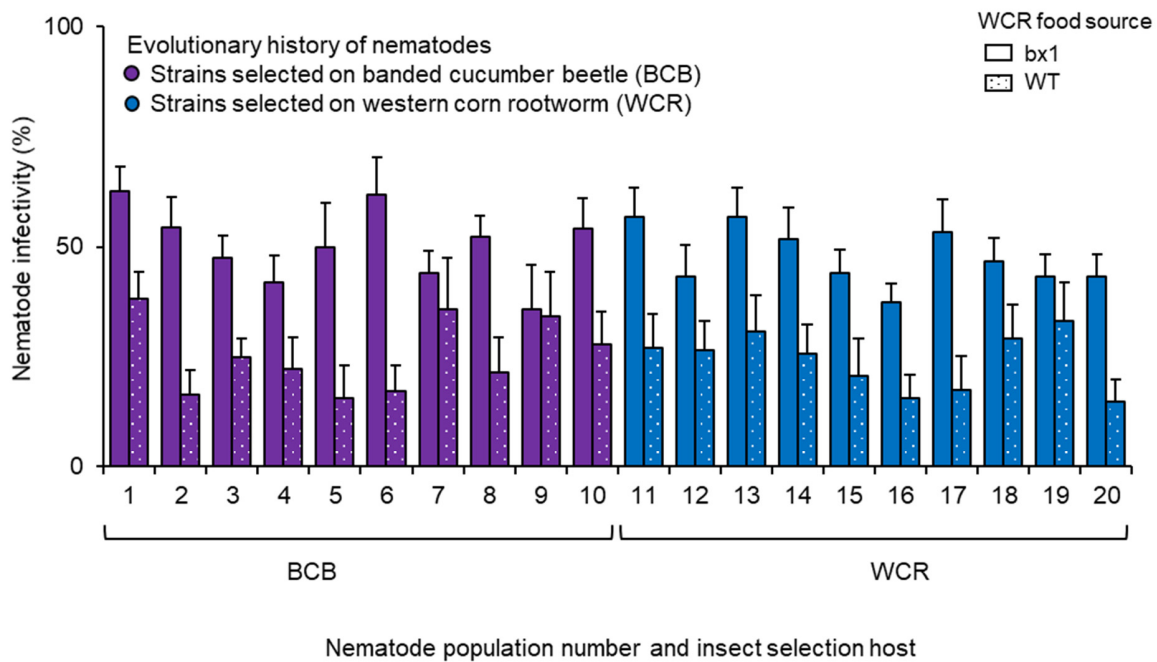

634 **Fig. S7. Impact of herbivore-sequestered benzoxazinoids on nematode infectivity after one**  
635 **generation of artificial selection on different herbivores.** Infectivity of individual nematode  
636 strains selected on the western corn rootworm (WCR; blue) or the banded cucumber beetle (BCB;  
637 purple) towards WCR larvae fed on *bx1* mutant (*bx1*; plain filled bars) and wild type (WT; dotted  
638 bars) maize roots is shown.  
639

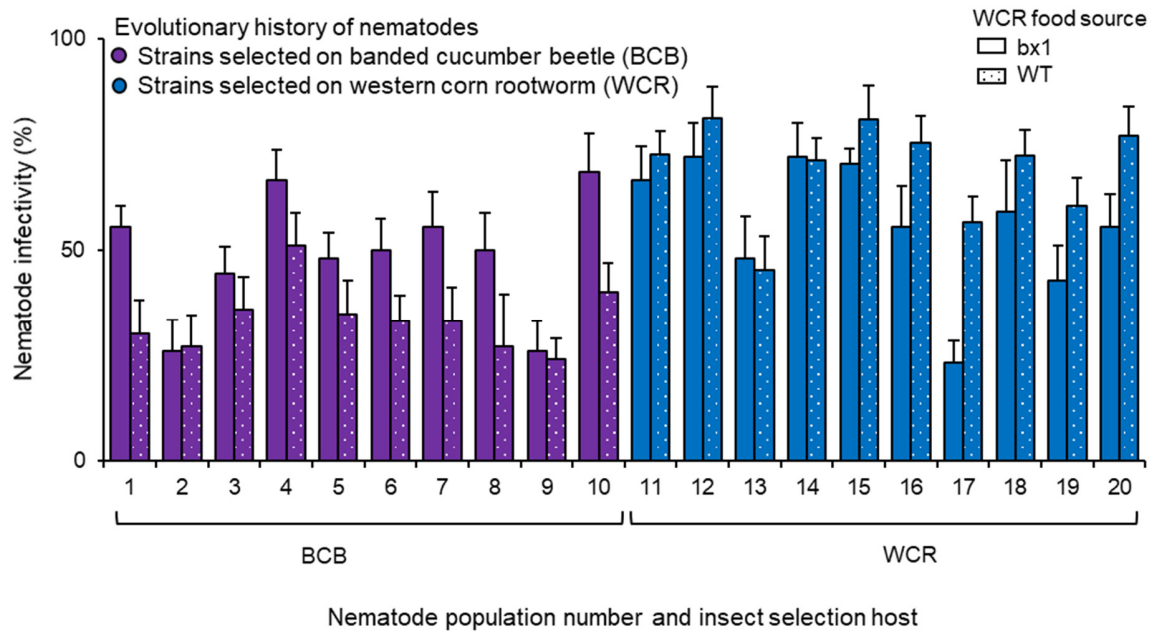

640 **Fig. S8. Impact of herbivore-sequestered benzoxazinoids on nematode infectivity after five**  
641 **generations of artificial selection on different herbivores.** Infectivity of individual nematode  
642 strains selected on the western corn rootworm (WCR; blue) or the banded cucumber beetle (BCB;  
643 purple) towards WCR larvae fed on  $bx1$  mutant ( $bx1$ ; plain filled bars) and wild type (WT; dotted  
644 bars) maize roots is shown.  
645

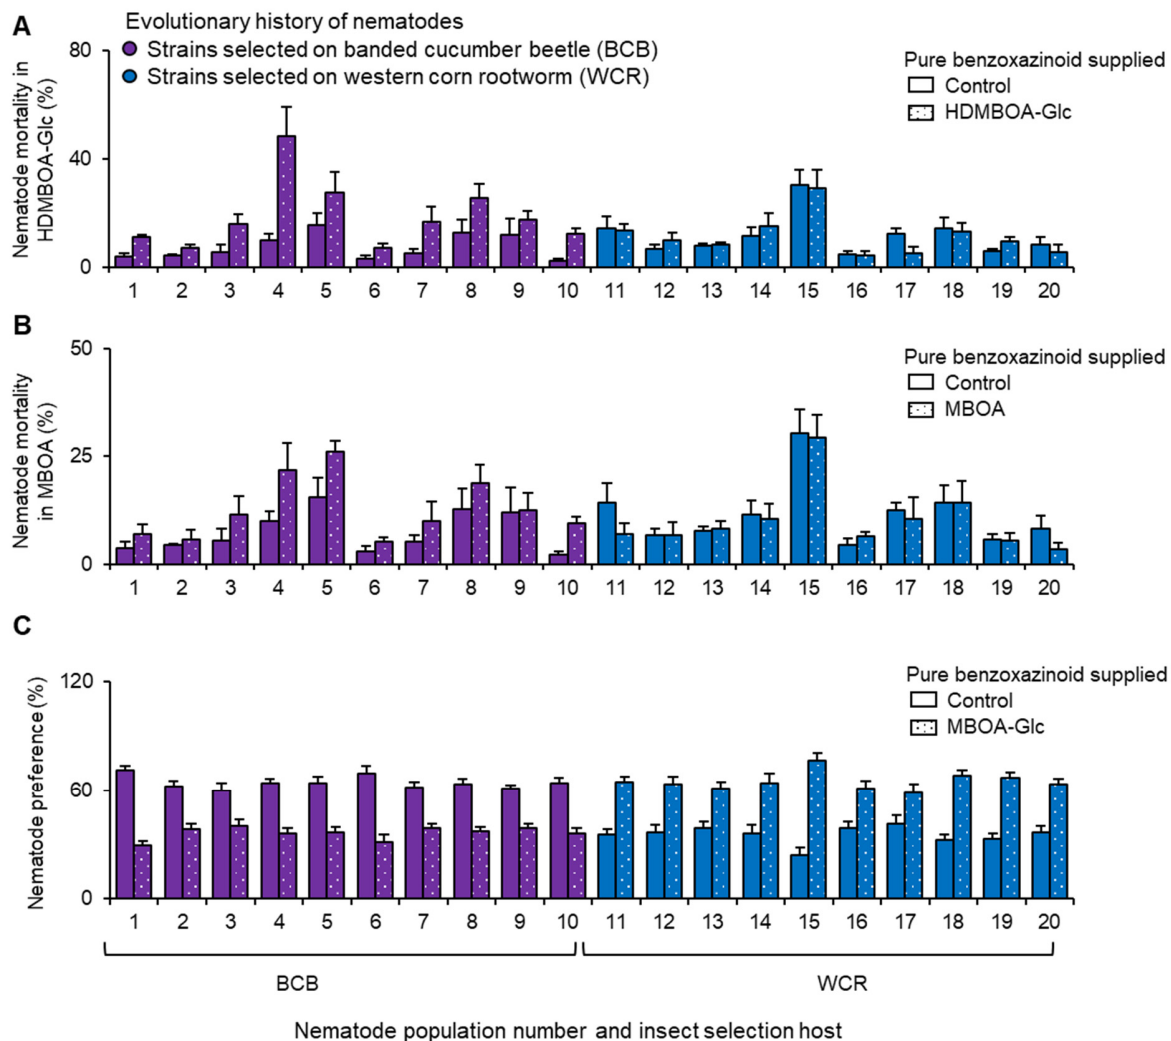

646  
647  
648  
649  
650  
651  
652

**Fig. S9. Impact of pure benzoxazinoids on individual nematode populations after 5 generations of artificial selection.** (A) Mortality of individual nematode strains after five generations of selection on the western corn rootworm (WCR; blue) or the banded cucumber beetle (BCB; purple) treated with water (plain filled bars) or 150  $\mu\text{g}/\text{mL}$  HDMBOA-Glc (dotted bars) is shown. (B) Mortality of nematodes treated with water or 25  $\mu\text{g}/\text{mL}$  MBOA. (C) Preference of nematodes for water or 3  $\mu\text{g}/\text{mL}$  MBOA-Glc.

653  
654

**Table S1. Source and evolutionary histories of the different nematode strains**

| Strain            | Abbreviation | Potential evolutionary history with WCR (years) | Nematode species        | Country of origin               | Location within country | Source                 |
|-------------------|--------------|-------------------------------------------------|-------------------------|---------------------------------|-------------------------|------------------------|
| Boj (Hbz 90,2,24) | BOJ          | 0                                               | <i>H. bacteriophora</i> | Iran                            | Bojnourd                | Kamali Shokoofeh, 2014 |
| HU 2              | HU2          | 0*                                              |                         | Hungary                         | N.a.                    | e-nema GmbH            |
| IR 2              | IR2          | 0                                               |                         | Iran                            | N.a.                    | e-nema GmbH            |
| DE 2              | DE2          | 0*                                              |                         | Germany                         | N.a.                    | e-nema GmbH            |
| DE 6              | DE6          | 0*                                              |                         | Germany                         | N.a.                    | e-nema GmbH            |
| EN 01             | EN01         | 0**                                             |                         | Commercial                      | N.a.                    | e-nema GmbH            |
| IL 9              | IL9          | 0                                               |                         | Australia                       | N.a.                    | e-nema GmbH            |
| IT 6              | IT6          | 0*                                              |                         | Italy                           | N.a.                    | e-nema GmbH            |
| MG 618b           | MG           | 0                                               |                         | Switzerland                     | Le Cerneux-Péquignot    | Raquel Campos-Herrera  |
| RW14-N-C4a        | RW14         | 0                                               |                         | Rwanda                          | Nyamagabe               | X. Yan, 2016           |
| M13e              | TT01         | 0                                               |                         | Republic of Trinidad and Tobago | N.a.                    | P. Constant, 1998      |
| Hb 17             | HB17         | 0                                               |                         | Turkey                          | Kirklareli              | TC Ulu, 2014           |
| PT 1              | PT1          | 0                                               |                         | Portugal                        | N.a.                    | e-nema GmbH            |
| 09-43             | S0943        | 0                                               |                         | Turkey                          | Aydin                   | I. Kepenekci, 2013     |
| S12               | S12          | 52***                                           |                         | USA                             | Minnesota               | Own collection         |
| S14               | S14          | 62***                                           |                         | USA                             | Kansas                  | Own collection         |
| S15               | S15          | 62***                                           |                         | USA                             | Kansas                  | Own collection         |
| S5P8              | S5           | 52***                                           |                         | USA                             | Illinois                | Own collection         |
| S7                | S7           | 52***                                           |                         | USA                             | Iowa                    | Own collection         |
| CN 4              | CN4          | 0                                               |                         | <i>H. beicherriana</i>          | China                   | N.a.                   |
| H06               | HO6          | 0                                               | China                   |                                 | Shandong                | R.C. Han, 1996         |
| LJ-24             | LJ24         | 0                                               | China                   |                                 | Liaoning                | J. Ma, 2013            |
| S10               | S10          | 62                                              | <i>H. georgiana</i>     | USA                             | South Dakota            | Own collection         |
| S8                | S8           | 62                                              |                         | USA                             | Nebraska                | Own collection         |
| S9                | S9           | 62                                              |                         | USA                             | Nebraska                | Own collection         |

655  
656  
657  
658  
659

\* *Nematodes were collected prior to invasion of Europe by the western corn rootworm*

\*\* *Artificially generated, commercial strain*

\*\*\* *Nematodes were isolated from maize fields within the primary range of the western corn rootworm*



660  
661

**Table S2. Numbers of individual biological replicates measured in the different experiments**

| Main figure   | Supplementary figure | No. | Nematode strains               | Treatment          | Number of independent replicates per treatment/nematode strain | Unit for replicate                            |                                     |
|---------------|----------------------|-----|--------------------------------|--------------------|----------------------------------------------------------------|-----------------------------------------------|-------------------------------------|
| Figure 1B     | Figure S1            |     |                                | BCB/WCR            | 5                                                              | Five herbivores                               |                                     |
| Figure 1C     | Figure S2            |     | All strains                    | BCB                | 7*                                                             | Solo cup containing 3-5 individual herbivores |                                     |
|               |                      |     | LJ24                           | WCR                | 22                                                             |                                               |                                     |
|               |                      |     | Other strains                  |                    | 24                                                             |                                               |                                     |
| Figure 2A     | Figure S3            |     |                                | BX- /BX+           | 5                                                              | Five herbivores                               |                                     |
| Figure 2B     | Figure S4            |     | All strains                    | BX-                | 5*                                                             | Solo cup containing 3-5 individual herbivores |                                     |
|               |                      |     |                                | BX+                | 10                                                             |                                               |                                     |
| Figure 2D     | Figure S6            | A   | All strains                    | Control/HDMBOA-Glc | 10                                                             | Flask containing 4000 nematodes               |                                     |
| Figure 2E     |                      | B   | All strains                    | Control/MBOA       | 10                                                             |                                               |                                     |
| Figure 2F     |                      | C   | Boj                            | MBOA-Glc           |                                                                | 19                                            | Petri dish containing 100 nematodes |
|               |                      |     | HU 2                           |                    |                                                                | 18                                            |                                     |
| Other strains | 20                   |     |                                |                    |                                                                |                                               |                                     |
| Figure 3A     | Figure S7            |     | All lines                      | BX- /BX+           | 10                                                             | Solo cup containing 3-5 individual herbivores |                                     |
| Figure 3B     | Figure S8            |     | Line 17                        | BX-                | 10                                                             |                                               |                                     |
|               |                      |     | Other Lines                    |                    | 9                                                              |                                               |                                     |
|               |                      |     | Line 17                        | BX+                | 10                                                             |                                               |                                     |
|               |                      |     | Line 1, 2, 6, 8, 9, 11, 13, 19 |                    | 11                                                             |                                               |                                     |
|               |                      |     | Other Lines                    |                    | 16                                                             |                                               |                                     |
| Figure 3D     | Figure S9            | A   | All lines                      | Control/HDMBOA-Glc | 8                                                              | Flask containing 4000 nematodes               |                                     |
| Figure 3E     |                      | B   | All lines                      | Control/MBOA       | 8                                                              |                                               |                                     |
| Figure 3F     |                      | C   | Line 12, 15, 17, 20            | MBOA-Glc           |                                                                | 19                                            | Petri dish containing 100 nematodes |
|               | Other Lines          | 20  |                                |                    |                                                                |                                               |                                     |

662  
663  
664  
665

\* Lower number of replicates are due to the lower availability of BCB and BX- WCR larvae at the time of experiment.

666  
667

**Table S3. Summary of statistical models for main factors and interactions**

| Figure    | Model            | Variable 1            |                  |         | Variable 2           |                   |         | Interactions     |                         |
|-----------|------------------|-----------------------|------------------|---------|----------------------|-------------------|---------|------------------|-------------------------|
|           |                  | Variabe               | Test stastic     | P-value | Variabe              | Test stastic      | P-value | Test stastic     | P-value of interactions |
| Figure 1B | Student's t test | HDMBOA-Glc            | t = 5.98         | <0.001  |                      |                   |         |                  |                         |
|           |                  | MBOA                  | t = 4.34         | 0.003   |                      |                   |         |                  |                         |
| Figure 1C | GLMM*            | Nematode host         | $\chi^2 = 41.83$ | <0.001  | Evolutionary history | $\chi^2 = 11.13$  | <0.001  | $\chi^2 = 18.97$ | <0.001                  |
| Figure 2A | Student's t test | HDMBOA-Glc            | t = 7.68         | <0.001  |                      |                   |         |                  |                         |
|           |                  | MBOA                  | t = 6.94         | <0.001  |                      |                   |         |                  |                         |
| Figure 2B | GLMM*            | WCR food souce        | $\chi^2 = 30.34$ | <0.001  | Evolutionary history | $\chi^2 = 24.79$  | <0.001  | $\chi^2 = 7.55$  | 0.006                   |
| Figure 2D | GLMM*            | HDMBOA-Glc supplement | $\chi^2 = 5.91$  | 0.015   | Evolutionary history | $\chi^2 = 2.32$   | 0.128   | $\chi^2 = 1.40$  | 0.236                   |
| Figure 2E | GLMM*            | MBOA supplement       | $\chi^2 = 5.06$  | 0.025   | Evolutionary history | $\chi^2 = 2.32$   | 0.128   | $\chi^2 = 0.97$  | 0.324                   |
| Figure 2F | Wald test        | WCR-                  | z = -9.45        | <0.001  | Evolutionary history | $\chi^2 = 56.33$  | <0.001  |                  |                         |
|           |                  | WCR+                  | z = 0.70         | 0.483   |                      |                   |         |                  |                         |
| Figure 3A | GLMM*            | Nematode host         | $\chi^2 = 74.70$ | <0.001  | Selction host        | $\chi^2 = 0.72$   | 0.397   | $\chi^2 = 0.03$  | 0.857                   |
| Figure 3B | GLMM*            | Nematode host         | $\chi^2 = 0.06$  | 0.805   | Selction host        | $\chi^2 = 23.54$  | <0.001  | $\chi^2 = 29.51$ | <0.001                  |
| Figure 3C | GLMM*            | HDMBOA-Glc supplement | $\chi^2 = 25.85$ | <0.001  | Selction host        | $\chi^2 = 0.07$   | 0.789   | $\chi^2 = 25.85$ | <0.001                  |
| Figure 3D | GLMM*            | MBOA supplement       | $\chi^2 = 6.00$  | 0.014   | Selction host        | $\chi^2 = 0.12$   | 0.734   | $\chi^2 = 17.57$ | <0.001                  |
| Figure3E  | Wald test        | BCB                   | z = -13.15       | <0.001  | Selction host        | $\chi^2 = 306.03$ | <0.001  |                  |                         |
|           |                  | WCR                   | z = 11.00        | <0.001  |                      |                   |         |                  |                         |

668  
669

\* Generalized linear mixed model

670  
671  
672  
673

### Table S4. Summary of model selection procedures for multivariate analyses

#### Model selection for Fig. 2

| Intercept | HDMBOA-Glc toxicity (HG) | MBOA toxicity (M) | MBOA-Glc repellency (MG) | HG x M | HG x MG | M x MG | AICc  | $\Delta$ AICc | w     | R <sup>2</sup> |
|-----------|--------------------------|-------------------|--------------------------|--------|---------|--------|-------|---------------|-------|----------------|
| 0.910     |                          |                   | -1.665                   |        |         |        | -27.9 | 0.00          | 0.547 | 0.374          |
| 0.852     | 0.258                    |                   | -1.565                   |        |         |        | -25.5 | 2.39          | 0.165 | 0.385          |
| 0.884     |                          | 0.156             | -1.619                   |        |         |        | -25.2 | 2.75          | 0.138 | 0.376          |
| 0.729     | 2.250                    |                   | -1.304                   |        | -4.424  |        | -22.8 | 5.14          | 0.042 | 0.395          |
| 0.860     | 0.484                    | -0.351            | -1.579                   |        |         |        | -22.5 | 5.37          | 0.037 | 0.390          |
| 0.847     |                          | 1.091             | -1.539                   |        |         | -2.163 | -22.0 | 5.87          | 0.029 | 0.377          |
| 0.729     | 2.654                    | -0.405            | -1.302                   |        | -4.741  |        | -19.5 | 8.42          | 0.008 | 0.401          |
| 0.717     | 0.710                    | 2.776             | -1.271                   |        |         | -7.783 | -19.4 | 8.48          | 0.008 | 0.399          |
| 0.874     | 0.382                    | -0.506            | -1.606                   | 1.809  |         |        | -19.2 | 8.75          | 0.007 | 0.393          |
| 0.167     |                          |                   |                          |        |         |        | -18.8 | 9.10          | 0.006 | 0.000          |
| 0.129     | 0.679                    |                   |                          |        |         |        | -18.6 | 9.35          | 0.005 | 0.090          |
| 0.139     |                          | 0.693             |                          |        |         |        | -17.7 | 10.23         | 0.003 | 0.057          |
| 0.130     | 0.761                    | -0.125            |                          |        |         |        | -15.7 | 12.20         | 0.001 | 0.090          |
| 0.740     | 2.507                    | -0.440            | -1.324                   | 0.443  | -4.474  |        | -15.6 | 12.33         | 0.001 | 0.401          |
| 0.735     | 3.018                    | -1.092            | -1.315                   |        | -5.644  | 1.686  | -15.6 | 12.34         | 0.001 | 0.401          |
| 0.727     | 0.678                    | 2.576             | -1.293                   | 0.345  |         | -7.359 | -15.5 | 12.40         | 0.001 | 0.399          |
| 0.129     | 0.814                    | -0.042            |                          | -0.986 |         |        | -12.6 | 15.33         | 0.000 | 0.091          |
| 0.754     | 3.094                    | -1.638            | -1.354                   | 0.570  | -5.958  | 2.915  | -11.2 | 16.74         | 0.000 | 0.401          |

674  
675  
676  
677

#### Model selection for Fig. 3

| Intercept | HDMBOA-Glc toxicity (HG) | MBOA Toxicity (M) | MBOA-Glc repellency (MG) | HG x M  | HG x MG | M x MG  | AICc  | $\Delta$ AICc | w     | R <sup>2</sup> |
|-----------|--------------------------|-------------------|--------------------------|---------|---------|---------|-------|---------------|-------|----------------|
| 0.505     |                          |                   | -0.983                   |         |         |         | -27.0 | 0.00          | 0.423 | 0.650          |
| 0.378     | 0.578                    |                   | -0.792                   |         |         |         | -26.0 | 1.05          | 0.251 | 0.685          |
| 0.516     |                          | -0.083            | -1.002                   |         |         |         | -23.9 | 3.16          | 0.087 | 0.650          |
| 0.434     | -0.918                   |                   | -0.892                   |         | 3.667   |         | -23.6 | 3.43          | 0.076 | 0.704          |
| 0.440     | 0.731                    | -0.697            | -0.899                   |         |         |         | -23.1 | 3.96          | 0.058 | 0.696          |
| 0.479     |                          | 3.058             | -0.969                   |         |         | -7.371  | -21.7 | 5.32          | 0.030 | 0.675          |
| 0.515     | -0.922                   | -0.838            | -1.033                   |         | 4.129   |         | -20.5 | 6.53          | 0.016 | 0.719          |
| 0.531     | -2.548                   | 4.756             | -1.114                   |         | 7.893   | -13.190 | -20.2 | 6.79          | 0.014 | 0.777          |
| 0.414     | 0.675                    | 1.995             | -0.879                   |         |         | -6.204  | -20.0 | 6.98          | 0.013 | 0.713          |
| 0.219     | 2.175                    | 9.359             | -0.602                   | -29.360 |         | -19.380 | -19.9 | 7.10          | 0.012 | 0.774          |
| 0.414     | 1.018                    | -0.405            | -0.857                   | -5.205  |         |         | -19.2 | 7.85          | 0.008 | 0.700          |
| -0.072    | 1.562                    |                   |                          |         |         |         | -17.5 | 9.50          | 0.004 | 0.437          |
| 0.781     | -5.418                   | -2.536            | -1.489                   | 25.560  | 11.840  |         | -17.3 | 9.72          | 0.003 | 0.742          |
| -0.073    | 1.144                    | 1.017             |                          |         |         |         | -15.6 | 11.46         | 0.001 | 0.470          |
| 0.408     | -0.774                   | 6.817             | -0.916                   | -12.150 | 5.070   | -16.150 | -14.7 | 12.35         | 0.001 | 0.779          |
| -0.043    |                          | 2.372             |                          |         |         |         | -14.6 | 12.38         | 0.001 | 0.350          |
| -0.077    | 1.969                    | 1.670             |                          | -16.010 |         |         | -13.7 | 13.28         | 0.001 | 0.516          |
| 0.012     |                          |                   |                          |         |         |         | -8.8  | 18.19         | 0.000 | 0.000          |

678  
679  
680  
681

#### Summary of the averaged model:

| Term                | Estimate | SE    | Relative importance |
|---------------------|----------|-------|---------------------|
| Intercept           | 0.458    | 0.121 | -                   |
| MBOA-Glc repellency | -0.912   | 0.210 | 1.00                |
| HDMBOA-Glc toxicity | 0.215    | 0.379 | 0.37                |

*R<sup>2</sup> of the averaged model: 0.671*

682  
683  
684
